# Supplementary material
Source: publisher figshare collection journal article supplement (https://acs.figshare.com/ndownloader/files/4187542)
Supplement: Supplementary file 1 [file 4187542]

 
data_1(CdI3)2+2CH3OH 
 
_audit_creation_method            SHELXL-97 
_chemical_name_systematic 
; 
 ? 
; 
_chemical_name_common             ? 
_chemical_melting_point           ? 
_chemical_formula_moiety          ? 
_chemical_formula_sum 
 'C54 H60 Cd2 I6 N4 O10' 
_chemical_formula_weight          1911.26 
 
loop_ 
 _atom_type_symbol 
 _atom_type_description 
 _atom_type_scat_dispersion_real 
 _atom_type_scat_dispersion_imag 
 _atom_type_scat_source 
 'C'  'C'   0.0033   0.0016 
 'International Tables Vol C Tables 4.2.6.8 and 6.1.1.4' 
 'H'  'H'   0.0000   0.0000 
 'International Tables Vol C Tables 4.2.6.8 and 6.1.1.4' 
 'Cd'  'Cd'  -0.8075   1.2024 
 'International Tables Vol C Tables 4.2.6.8 and 6.1.1.4' 
 'I'  'I'  -0.4742   1.8119 
 'International Tables Vol C Tables 4.2.6.8 and 6.1.1.4' 
 'N'  'N'   0.0061   0.0033 
 'International Tables Vol C Tables 4.2.6.8 and 6.1.1.4' 
 'O'  'O'   0.0106   0.0060 
 'International Tables Vol C Tables 4.2.6.8 and 6.1.1.4' 
 
_symmetry_cell_setting           'Triclinic'
_symmetry_space_group_name_H-M   'P-1   '
 
loop_ 
 _symmetry_equiv_pos_as_xyz 
 'x, y, z' 
 '-x, -y, -z' 
 
_cell_length_a                    9.8786(2) 
_cell_length_b                    16.8160(3) 
_cell_length_c                    20.8803(3) 
_cell_angle_alpha                 98.6420(10) 
_cell_angle_beta                  102.6330(10) 
_cell_angle_gamma                 105.0150(10) 
_cell_volume                      3189.31(10) 
_cell_formula_units_Z             2 
_cell_measurement_temperature     100(2) 
_cell_measurement_reflns_used     8439
_cell_measurement_theta_min       2.18
_cell_measurement_theta_max       19.45
 
_exptl_crystal_description        'fragment'
_exptl_crystal_colour             'blue'
_exptl_crystal_size_max           0.14 
_exptl_crystal_size_mid           0.09 
_exptl_crystal_size_min           0.05 
_exptl_crystal_density_meas       ? 
_exptl_crystal_density_diffrn     1.990 
_exptl_crystal_density_method     'not measured' 
_exptl_crystal_F_000              1812 
_exptl_absorpt_coefficient_mu     3.625 
_exptl_absorpt_correction_type    multi-scan 
_exptl_absorpt_correction_T_min   0.6671
_exptl_absorpt_correction_T_max   0.7461 
_exptl_absorpt_process_details    ? 
 
_exptl_special_details 
; 
 ? 
; 
 
_diffrn_ambient_temperature       100(2) 
_diffrn_radiation_wavelength      0.71073 
_diffrn_radiation_type            MoK\a 
_diffrn_radiation_source          'fine-focus sealed tube' 
_diffrn_radiation_monochromator   graphite 
_diffrn_measurement_device_type   'Bruker APEX-II CCD'
_diffrn_measurement_method        '\f and \w scans'
_diffrn_detector_area_resol_mean  ? 
_diffrn_reflns_number             102629 
_diffrn_reflns_av_R_equivalents   0.1127 
_diffrn_reflns_av_sigmaI/netI     0.1764 
_diffrn_reflns_limit_h_min        -13 
_diffrn_reflns_limit_h_max        13 
_diffrn_reflns_limit_k_min        -23 
_diffrn_reflns_limit_k_max        23 
_diffrn_reflns_limit_l_min        -29 
_diffrn_reflns_limit_l_max        28 
_diffrn_reflns_theta_min          1.02 
_diffrn_reflns_theta_max          30.03 
_reflns_number_total              18525 
_reflns_number_gt                 7402 
_reflns_threshold_expression      >2sigma(I) 
 
_computing_data_collection      'Bruker APEX2'
_computing_cell_refinement      'Bruker SAINT'
_computing_data_reduction       'Bruker SAINT'
_computing_structure_solution   'SHELXS-97 (Sheldrick, 2008)'
_computing_structure_refinement 'SHELXL-97 (Sheldrick, 2008)'
_computing_molecular_graphics   'Bruker SHELXTL'
_computing_publication_material 'Bruker SHELXTL'
 
_refine_special_details 
; 
 Refinement of F^2^ against ALL reflections.  The weighted R-factor wR and 
 goodness of fit S are based on F^2^, conventional R-factors R are based 
 on F, with F set to zero for negative F^2^. The threshold expression of 
 F^2^ > 2sigma(F^2^) is used only for calculating R-factors(gt) etc. and is 
 not relevant to the choice of reflections for refinement.  R-factors based 
 on F^2^ are statistically about twice as large as those based on F, and R- 
 factors based on ALL data will be even larger. 
; 
 
_refine_ls_structure_factor_coef  Fsqd  
_refine_ls_matrix_type            full 
_refine_ls_weighting_scheme       calc  
_refine_ls_weighting_details 
 'calc w=1/[\s^2^(Fo^2^)+(0.0589P)^2^+13.4751P] where P=(Fo^2^+2Fc^2^)/3' 
_atom_sites_solution_primary      direct 
_atom_sites_solution_secondary    difmap 
_atom_sites_solution_hydrogens    geom 
_refine_ls_hydrogen_treatment     constr 
_refine_ls_extinction_method      none 
_refine_ls_extinction_coef        ? 
_refine_ls_number_reflns          18525 
_refine_ls_number_parameters      689 
_refine_ls_number_restraints      1 
_refine_ls_R_factor_all           0.2182 
_refine_ls_R_factor_gt            0.0730 
_refine_ls_wR_factor_ref          0.1776 
_refine_ls_wR_factor_gt           0.1363 
_refine_ls_goodness_of_fit_ref    0.985 
_refine_ls_restrained_S_all       0.985 
_refine_ls_shift/su_max           1.032 
_refine_ls_shift/su_mean          0.018 
 
loop_ 
 _atom_site_label 
 _atom_site_type_symbol 
 _atom_site_fract_x 
 _atom_site_fract_y 
 _atom_site_fract_z 
 _atom_site_U_iso_or_equiv 
 _atom_site_adp_type 
 _atom_site_occupancy 
 _atom_site_symmetry_multiplicity 
 _atom_site_calc_flag 
 _atom_site_refinement_flags 
 _atom_site_disorder_assembly 
 _atom_site_disorder_group 
Cd1 Cd 0.11591(9) 0.16116(4) 0.32144(4) 0.0417(2) Uani 1 1 d . . . 
I1 I 0.38342(10) 0.14394(5) 0.37139(4) 0.0664(3) Uani 1 1 d . . . 
I2 I -0.07102(10) 0.15438(5) 0.40080(4) 0.0624(2) Uani 1 1 d . . . 
I3 I 0.00234(8) 0.08723(5) 0.18775(4) 0.0579(2) Uani 1 1 d . . . 
I4 I 0.71315(9) 1.42059(6) 0.31032(4) 0.0607(2) Uani 1 1 d . . . 
I5 I 0.89665(8) 1.34401(4) 0.13539(3) 0.04265(19) Uani 1 1 d . . . 
I6 I 0.41530(9) 1.35552(5) 0.09336(4) 0.0588(2) Uani 1 1 d . . . 
Cd2 Cd 0.65471(8) 1.34098(4) 0.17957(4) 0.03606(19) Uani 1 1 d . . . 
O1 O 0.0113(7) 0.7955(4) 0.0936(3) 0.0435(18) Uani 1 1 d . . . 
O2 O 0.2196(7) 0.8456(5) 0.0139(3) 0.0461(18) Uani 1 1 d . . . 
O3 O 0.5307(7) 0.9097(4) 0.0495(3) 0.0428(18) Uani 1 1 d . . . 
O4 O 0.6637(7) 0.8256(4) 0.1558(3) 0.0367(16) Uani 1 1 d . . . 
O5 O 0.6393(7) 0.6789(4) 0.3971(3) 0.0446(18) Uani 1 1 d . . . 
O6 O 0.4401(10) 0.5969(9) 0.4716(4) 0.126(5) Uani 1 1 d . . . 
O7 O 0.1666(12) 0.6209(6) 0.4554(5) 0.085(3) Uani 1 1 d . . . 
O8 O 0.0072(7) 0.6812(4) 0.3484(4) 0.0431(18) Uani 1 1 d . . . 
O9 O 0.7276(10) 0.3469(6) 0.9599(5) 0.090(3) Uani 1 1 d . . . 
H90 H 0.8106 0.3436 0.9702 0.135 Uiso 1 1 calc R . . 
O10 O 0.412(4) 0.868(2) 0.4549(9) 0.308(15) Uani 1 1 d D . . 
H10O H 0.4541 0.8525 0.4868 0.461 Uiso 1 1 calc R . . 
N1 N 0.1708(9) 0.3016(5) 0.3133(4) 0.040(2) Uani 1 1 d . . . 
N2 N 0.2510(7) 0.5461(4) 0.2762(4) 0.0262(17) Uani 1 1 d . . . 
N3 N 0.4338(8) 0.9546(5) 0.2186(4) 0.0292(18) Uani 1 1 d . . . 
N4 N 0.5682(9) 1.2003(5) 0.1881(4) 0.0337(19) Uani 1 1 d . . . 
C1 C 0.1037(11) 0.3547(6) 0.3360(5) 0.040(3) Uani 1 1 d . . . 
H1 H 0.0361 0.3358 0.3594 0.048 Uiso 1 1 calc R . . 
C2 C 0.1299(11) 0.4375(6) 0.3264(5) 0.038(2) Uani 1 1 d . . . 
H2 H 0.0844 0.4737 0.3446 0.045 Uiso 1 1 calc R . . 
C3 C 0.2247(10) 0.4628(6) 0.2894(5) 0.032(2) Uani 1 1 d . . . 
C4 C 0.2956(12) 0.4090(6) 0.2650(6) 0.048(3) Uani 1 1 d . . . 
H4 H 0.3611 0.4257 0.2401 0.058 Uiso 1 1 calc R . . 
C5 C 0.2653(12) 0.3286(7) 0.2791(6) 0.051(3) Uani 1 1 d . . . 
H5 H 0.3138 0.2923 0.2637 0.061 Uiso 1 1 calc R . . 
C6 C 0.2416(10) 0.5573(6) 0.2126(5) 0.032(2) Uani 1 1 d . . . 
H6 H 0.2140 0.5106 0.1772 0.039 Uiso 1 1 calc R . . 
C7 C 0.2724(9) 0.6370(6) 0.1999(5) 0.029(2) Uani 1 1 d . . . 
H7 H 0.2663 0.6441 0.1561 0.035 Uiso 1 1 calc R . . 
C8 C 0.3126(9) 0.7070(6) 0.2526(5) 0.029(2) Uani 1 1 d . . . 
C9 C 0.3183(9) 0.6929(5) 0.3163(4) 0.027(2) Uani 1 1 d . . . 
H9 H 0.3453 0.7389 0.3523 0.033 Uiso 1 1 calc R . . 
C10 C 0.2852(10) 0.6128(5) 0.3282(5) 0.031(2) Uani 1 1 d . . . 
H10 H 0.2862 0.6046 0.3714 0.037 Uiso 1 1 calc R . . 
C11 C 0.3803(11) 0.8875(6) 0.1666(5) 0.036(2) Uani 1 1 d . . . 
H11 H 0.3715 0.8958 0.1230 0.044 Uiso 1 1 calc R . . 
C12 C 0.3385(10) 0.8071(6) 0.1764(5) 0.033(2) Uani 1 1 d . . . 
H12 H 0.3004 0.7615 0.1396 0.040 Uiso 1 1 calc R . . 
C13 C 0.3525(9) 0.7936(5) 0.2402(4) 0.023(2) Uani 1 1 d . . . 
C14 C 0.4051(10) 0.8636(6) 0.2933(5) 0.034(2) Uani 1 1 d . . . 
H14 H 0.4132 0.8565 0.3371 0.041 Uiso 1 1 calc R . . 
C15 C 0.4454(10) 0.9435(6) 0.2813(5) 0.038(2) Uani 1 1 d . . . 
H15 H 0.4809 0.9901 0.3172 0.046 Uiso 1 1 calc R . . 
C16 C 0.6623(12) 1.1659(7) 0.2182(7) 0.074(4) Uani 1 1 d . . . 
H16 H 0.7604 1.1968 0.2318 0.088 Uiso 1 1 calc R . . 
C17 C 0.6209(12) 1.0840(7) 0.2308(7) 0.071(4) Uani 1 1 d . . . 
H17 H 0.6889 1.0618 0.2539 0.085 Uiso 1 1 calc R . . 
C18 C 0.4810(10) 1.0399(5) 0.2081(5) 0.029(2) Uani 1 1 d . . . 
C19 C 0.3815(12) 1.0726(7) 0.1761(6) 0.052(3) Uani 1 1 d . . . 
H19 H 0.2837 1.0412 0.1597 0.063 Uiso 1 1 calc R . . 
C20 C 0.4315(12) 1.1555(7) 0.1687(6) 0.054(3) Uani 1 1 d . . . 
H20 H 0.3635 1.1800 0.1488 0.065 Uiso 1 1 calc R . . 
C21 C -0.0242(11) 0.7323(7) 0.1325(6) 0.043(3) Uani 1 1 d . . . 
C22 C -0.0700(11) 0.6499(7) 0.1068(5) 0.044(3) Uani 1 1 d . . . 
H22 H -0.0874 0.6305 0.0607 0.053 Uiso 1 1 calc R . . 
C23 C -0.0926(10) 0.5914(6) 0.1477(6) 0.041(3) Uani 1 1 d . . . 
H23 H -0.1254 0.5339 0.1285 0.049 Uiso 1 1 calc R . . 
C24 C -0.0670(10) 0.6181(7) 0.2146(5) 0.040(3) Uani 1 1 d . . . 
H24 H -0.0821 0.5797 0.2420 0.048 Uiso 1 1 calc R . . 
C25 C -0.0146(11) 0.7096(8) 0.2432(5) 0.049(3) Uani 1 1 d . . . 
C26 C 0.0034(10) 0.7638(7) 0.1996(6) 0.041(3) Uani 1 1 d . . . 
C27 C 0.0483(11) 0.8569(7) 0.2265(6) 0.053(3) Uani 1 1 d . . . 
H27 H 0.0582 0.8948 0.1984 0.064 Uiso 1 1 calc R . . 
C28 C 0.0732(11) 0.8826(7) 0.2917(6) 0.048(3) Uani 1 1 d . . . 
H28 H 0.0984 0.9403 0.3092 0.058 Uiso 1 1 calc R . . 
C29 C 0.0640(12) 0.8274(7) 0.3375(6) 0.051(3) Uani 1 1 d . . . 
H29 H 0.0875 0.8490 0.3836 0.062 Uiso 1 1 calc R . . 
C30 C 0.0192(12) 0.7409(8) 0.3118(6) 0.053(3) Uani 1 1 d . . . 
C31 C 0.0334(13) 0.7096(8) 0.4223(6) 0.058(3) Uani 1 1 d . . . 
H43A H 0.1267 0.7528 0.4414 0.070 Uiso 1 1 calc R . . 
H43B H -0.0423 0.7325 0.4320 0.070 Uiso 1 1 calc R . . 
C32 C 0.0320(15) 0.6349(8) 0.4502(6) 0.066(4) Uani 1 1 d . . . 
H44A H 0.0141 0.6435 0.4942 0.079 Uiso 1 1 calc R . . 
H44B H -0.0449 0.5863 0.4211 0.079 Uiso 1 1 calc R . . 
C33 C 0.233(2) 0.608(2) 0.5077(9) 0.222(17) Uani 1 1 d . . . 
H33A H 0.1811 0.5522 0.5108 0.266 Uiso 1 1 calc R . . 
H33B H 0.2221 0.6473 0.5441 0.266 Uiso 1 1 calc R . . 
C34 C 0.3832(16) 0.6136(11) 0.5230(6) 0.090(5) Uani 1 1 d . . . 
H34A H 0.4385 0.6702 0.5488 0.107 Uiso 1 1 calc R . . 
H34B H 0.3986 0.5751 0.5522 0.107 Uiso 1 1 calc R . . 
C35 C 0.5924(13) 0.6191(10) 0.4867(7) 0.084(5) Uani 1 1 d . . . 
H35A H 0.6198 0.5742 0.4629 0.101 Uiso 1 1 calc R . . 
H35B H 0.6317 0.6245 0.5345 0.101 Uiso 1 1 calc R . . 
C36 C 0.6573(16) 0.6988(10) 0.4682(7) 0.086(5) Uani 1 1 d . . . 
H36A H 0.7597 0.7219 0.4921 0.103 Uiso 1 1 calc R . . 
H36B H 0.6084 0.7399 0.4795 0.103 Uiso 1 1 calc R . . 
C37 C 0.6772(12) 0.7437(8) 0.3677(6) 0.057(3) Uani 1 1 d . . . 
C38 C 0.7310(12) 0.8288(8) 0.3964(7) 0.061(3) Uani 1 1 d . . . 
H38 H 0.7481 0.8457 0.4427 0.073 Uiso 1 1 calc R . . 
C39 C 0.7610(12) 0.8907(8) 0.3600(7) 0.060(3) Uani 1 1 d . . . 
H39 H 0.7989 0.9469 0.3829 0.072 Uiso 1 1 calc R . . 
C40 C 0.7372(11) 0.8721(7) 0.2931(6) 0.051(3) Uani 1 1 d . . . 
H40 H 0.7570 0.9146 0.2695 0.061 Uiso 1 1 calc R . . 
C41 C 0.6794(10) 0.7831(7) 0.2578(5) 0.038(2) Uani 1 1 d . . . 
C42 C 0.6588(11) 0.7248(7) 0.2979(6) 0.046(3) Uani 1 1 d . . . 
C43 C 0.6138(11) 0.6340(8) 0.2645(6) 0.058(3) Uani 1 1 d . . . 
H43 H 0.6013 0.5924 0.2893 0.070 Uiso 1 1 calc R . . 
C44 C 0.5916(10) 0.6135(7) 0.1979(6) 0.044(3) Uani 1 1 d . . . 
H44 H 0.5645 0.5570 0.1764 0.052 Uiso 1 1 calc R . . 
C45 C 0.6084(11) 0.6758(6) 0.1599(6) 0.050(3) Uani 1 1 d . . . 
H45 H 0.5905 0.6596 0.1135 0.059 Uiso 1 1 calc R . . 
C46 C 0.6504(11) 0.7596(8) 0.1898(7) 0.057(3) Uani 1 1 d . . . 
C47 C 0.6495(13) 0.8065(9) 0.0851(6) 0.068(4) Uani 1 1 d . . . 
H31A H 0.5562 0.7650 0.0619 0.082 Uiso 1 1 calc R . . 
H31B H 0.7259 0.7836 0.0764 0.082 Uiso 1 1 calc R . . 
C48 C 0.6606(12) 0.8862(7) 0.0607(6) 0.058(3) Uani 1 1 d . . . 
H13A H 0.7374 0.9315 0.0935 0.069 Uiso 1 1 calc R . . 
H13B H 0.6890 0.8801 0.0191 0.069 Uiso 1 1 calc R . . 
C49 C 0.4373(12) 0.8767(8) -0.0171(5) 0.052(3) Uani 1 1 d . . . 
H40A H 0.4206 0.8163 -0.0290 0.063 Uiso 1 1 calc R . . 
H40B H 0.4840 0.9021 -0.0485 0.063 Uiso 1 1 calc R . . 
C50 C 0.2961(11) 0.8941(7) -0.0225(5) 0.046(3) Uani 1 1 d . . . 
H14A H 0.3125 0.9535 -0.0047 0.055 Uiso 1 1 calc R . . 
H14B H 0.2406 0.8800 -0.0693 0.055 Uiso 1 1 calc R . . 
C51 C 0.0692(12) 0.8385(8) -0.0035(6) 0.059(3) Uani 1 1 d . . . 
H42A H 0.0316 0.8279 -0.0519 0.071 Uiso 1 1 calc R . . 
H42B H 0.0543 0.8904 0.0164 0.071 Uiso 1 1 calc R . . 
C52 C -0.0099(13) 0.7643(8) 0.0236(6) 0.067(4) Uani 1 1 d . . . 
H26A H -0.1129 0.7444 0.0004 0.080 Uiso 1 1 calc R . . 
H26B H 0.0303 0.7178 0.0169 0.080 Uiso 1 1 calc R . . 
C53 C 0.732(2) 0.4412(12) 0.9785(9) 0.179(11) Uani 1 1 d . . . 
H53A H 0.7790 0.4637 1.0255 0.269 Uiso 1 1 calc R . . 
H53B H 0.6342 0.4448 0.9688 0.269 Uiso 1 1 calc R . . 
H53C H 0.7848 0.4731 0.9525 0.269 Uiso 1 1 calc R . . 
C100 C 0.343(3) 0.9322(18) 0.480(2) 0.57(6) Uani 1 1 d D . . 
H10A H 0.3035 0.9551 0.4436 0.862 Uiso 1 1 calc R . . 
H10B H 0.4154 0.9768 0.5144 0.862 Uiso 1 1 calc R . . 
H10C H 0.2669 0.9055 0.4986 0.862 Uiso 1 1 calc R . . 
 
loop_ 
 _atom_site_aniso_label 
 _atom_site_aniso_U_11 
 _atom_site_aniso_U_22 
 _atom_site_aniso_U_33 
 _atom_site_aniso_U_23 
 _atom_site_aniso_U_13 
 _atom_site_aniso_U_12 
Cd1 0.0522(5) 0.0300(4) 0.0417(5) 0.0121(3) 0.0080(4) 0.0122(4) 
I1 0.0763(6) 0.0593(5) 0.0580(5) -0.0019(4) -0.0079(4) 0.0414(5) 
I2 0.0845(6) 0.0458(5) 0.0591(5) 0.0141(4) 0.0347(5) 0.0091(4) 
I3 0.0442(5) 0.0819(6) 0.0432(5) 0.0115(4) 0.0006(4) 0.0219(4) 
I4 0.0560(5) 0.0858(6) 0.0407(5) 0.0035(4) 0.0166(4) 0.0250(5) 
I5 0.0432(4) 0.0365(4) 0.0442(4) 0.0069(3) 0.0136(3) 0.0049(3) 
I6 0.0590(5) 0.0474(5) 0.0599(5) 0.0061(4) -0.0062(4) 0.0211(4) 
Cd2 0.0416(5) 0.0291(4) 0.0368(4) 0.0092(3) 0.0099(4) 0.0089(3) 
O1 0.037(4) 0.060(5) 0.034(4) 0.009(4) 0.007(3) 0.019(4) 
O2 0.031(4) 0.074(5) 0.040(4) 0.028(4) 0.008(3) 0.019(4) 
O3 0.032(4) 0.050(4) 0.043(4) 0.023(4) 0.007(3) 0.002(3) 
O4 0.028(4) 0.041(4) 0.047(4) 0.021(3) 0.014(3) 0.011(3) 
O5 0.046(5) 0.050(4) 0.040(4) 0.022(4) 0.012(4) 0.011(4) 
O6 0.044(6) 0.261(15) 0.047(6) 0.069(8) -0.002(5) -0.006(7) 
O7 0.116(8) 0.101(7) 0.077(7) 0.027(6) 0.044(6) 0.081(7) 
O8 0.044(4) 0.044(4) 0.057(5) 0.023(4) 0.028(4) 0.021(4) 
O9 0.088(7) 0.110(8) 0.059(6) 0.010(6) 0.010(6) 0.020(6) 
O10 0.47(4) 0.44(4) 0.054(10) 0.043(15) 0.070(16) 0.21(3) 
N1 0.041(5) 0.032(5) 0.054(6) 0.019(4) 0.010(4) 0.020(4) 
N2 0.023(4) 0.024(4) 0.030(4) 0.009(3) 0.003(3) 0.005(3) 
N3 0.029(4) 0.033(5) 0.036(5) 0.018(4) 0.017(4) 0.013(4) 
N4 0.033(5) 0.025(4) 0.044(5) 0.007(4) 0.013(4) 0.008(4) 
C1 0.041(6) 0.038(6) 0.048(7) 0.025(5) 0.016(5) 0.013(5) 
C2 0.046(6) 0.025(5) 0.041(6) 0.005(4) 0.012(5) 0.010(5) 
C3 0.029(5) 0.028(5) 0.035(6) 0.011(4) 0.002(4) 0.006(4) 
C4 0.058(7) 0.039(6) 0.074(8) 0.033(6) 0.043(7) 0.025(6) 
C5 0.049(7) 0.048(7) 0.072(8) 0.030(6) 0.031(7) 0.023(6) 
C6 0.030(5) 0.033(6) 0.036(6) 0.004(4) 0.012(5) 0.012(4) 
C7 0.018(5) 0.036(6) 0.035(6) 0.007(4) 0.007(4) 0.010(4) 
C8 0.026(5) 0.036(5) 0.035(6) 0.016(4) 0.016(4) 0.020(4) 
C9 0.027(5) 0.023(5) 0.027(5) 0.001(4) 0.003(4) 0.005(4) 
C10 0.038(6) 0.028(5) 0.025(5) 0.005(4) 0.009(4) 0.008(4) 
C11 0.047(6) 0.039(6) 0.022(5) 0.006(4) 0.003(5) 0.016(5) 
C12 0.039(6) 0.023(5) 0.039(6) 0.013(4) 0.014(5) 0.007(4) 
C13 0.017(5) 0.021(5) 0.034(5) 0.003(4) 0.010(4) 0.008(4) 
C14 0.038(6) 0.038(6) 0.030(5) 0.018(5) 0.010(5) 0.012(5) 
C15 0.039(6) 0.020(5) 0.043(6) -0.005(4) 0.003(5) 0.004(4) 
C16 0.028(6) 0.049(8) 0.126(12) 0.042(8) -0.009(7) -0.006(6) 
C17 0.032(7) 0.048(7) 0.117(12) 0.036(8) -0.012(7) 0.004(6) 
C18 0.033(6) 0.025(5) 0.035(6) 0.012(4) 0.015(5) 0.011(4) 
C19 0.036(6) 0.052(7) 0.085(9) 0.034(7) 0.027(6) 0.021(6) 
C20 0.045(7) 0.060(8) 0.081(9) 0.040(7) 0.024(7) 0.033(6) 
C21 0.031(6) 0.045(7) 0.066(8) 0.034(6) 0.017(6) 0.018(5) 
C22 0.033(6) 0.054(7) 0.046(7) 0.011(6) 0.012(5) 0.013(5) 
C23 0.031(6) 0.029(6) 0.061(8) 0.010(5) 0.015(5) 0.004(5) 
C24 0.030(6) 0.054(7) 0.041(6) 0.010(5) 0.011(5) 0.018(5) 
C25 0.024(6) 0.093(9) 0.024(6) -0.011(6) -0.001(5) 0.027(6) 
C26 0.027(6) 0.055(7) 0.050(7) 0.019(6) 0.010(5) 0.022(5) 
C27 0.033(6) 0.053(7) 0.074(9) -0.001(6) 0.017(6) 0.019(6) 
C28 0.042(7) 0.044(7) 0.065(8) 0.006(6) 0.018(6) 0.023(5) 
C29 0.047(7) 0.044(7) 0.072(8) 0.012(6) 0.027(6) 0.019(6) 
C30 0.052(7) 0.063(8) 0.056(8) 0.017(7) 0.024(6) 0.030(6) 
C31 0.063(8) 0.082(9) 0.052(8) 0.027(7) 0.022(6) 0.047(7) 
C32 0.105(11) 0.069(8) 0.051(8) 0.027(7) 0.046(8) 0.046(8) 
C33 0.083(15) 0.52(5) 0.090(15) 0.16(2) 0.037(12) 0.07(2) 
C34 0.085(12) 0.151(15) 0.030(7) 0.023(8) 0.025(8) 0.022(10) 
C35 0.048(8) 0.120(12) 0.072(10) 0.064(9) -0.010(7) 0.003(8) 
C36 0.080(11) 0.127(14) 0.061(10) 0.040(9) 0.020(8) 0.037(10) 
C37 0.035(7) 0.078(10) 0.061(8) 0.015(7) 0.015(6) 0.020(6) 
C38 0.047(8) 0.047(8) 0.076(9) -0.002(7) 0.010(7) 0.010(6) 
C39 0.041(7) 0.049(8) 0.081(10) -0.007(7) 0.011(7) 0.015(6) 
C40 0.031(6) 0.055(7) 0.064(8) -0.004(6) 0.014(6) 0.020(5) 
C41 0.018(5) 0.048(7) 0.048(7) 0.002(6) 0.011(5) 0.013(5) 
C42 0.032(6) 0.057(7) 0.052(7) 0.001(6) 0.011(5) 0.023(5) 
C43 0.027(6) 0.078(9) 0.064(9) 0.004(7) 0.001(6) 0.023(6) 
C44 0.029(6) 0.043(7) 0.057(8) 0.000(6) 0.011(5) 0.016(5) 
C45 0.032(6) 0.027(6) 0.084(9) -0.004(6) 0.013(6) 0.010(5) 
C46 0.026(6) 0.058(8) 0.083(10) 0.007(7) 0.010(6) 0.014(6) 
C47 0.048(8) 0.097(11) 0.060(9) 0.013(8) 0.019(7) 0.022(7) 
C48 0.038(7) 0.062(8) 0.073(9) 0.040(7) 0.020(6) -0.002(6) 
C49 0.041(7) 0.072(8) 0.036(7) 0.013(6) 0.014(6) 0.002(6) 
C50 0.046(7) 0.047(7) 0.033(6) 0.018(5) -0.002(5) -0.002(5) 
C51 0.046(7) 0.100(10) 0.039(7) 0.025(7) 0.008(6) 0.033(7) 
C52 0.042(7) 0.086(10) 0.072(10) 0.044(8) 0.012(7) 0.006(7) 
C53 0.22(2) 0.104(15) 0.119(17) -0.060(13) -0.062(16) 0.020(15) 
C100 0.35(6) 0.69(9) 0.36(6) 0.41(6) -0.13(4) -0.37(6) 
 
_geom_special_details 
; 
 All esds (except the esd in the dihedral angle between two l.s. planes) 
 are estimated using the full covariance matrix.  The cell esds are taken 
 into account individually in the estimation of esds in distances, angles 
 and torsion angles; correlations between esds in cell parameters are only 
 used when they are defined by crystal symmetry.  An approximate (isotropic) 
 treatment of cell esds is used for estimating esds involving l.s. planes. 
; 
 
loop_ 
 _geom_bond_atom_site_label_1 
 _geom_bond_atom_site_label_2 
 _geom_bond_distance 
 _geom_bond_site_symmetry_2 
 _geom_bond_publ_flag 
Cd1 N1 2.324(7) . ? 
Cd1 I1 2.7272(11) . ? 
Cd1 I2 2.7304(11) . ? 
Cd1 I3 2.7316(11) . ? 
I4 Cd2 2.7186(10) . ? 
I5 Cd2 2.7353(10) . ? 
I6 Cd2 2.7319(11) . ? 
Cd2 N4 2.346(7) . ? 
O1 C52 1.426(13) . ? 
O1 C21 1.451(11) . ? 
O2 C50 1.389(11) . ? 
O2 C51 1.418(12) . ? 
O3 C49 1.426(12) . ? 
O3 C48 1.420(13) . ? 
O4 C46 1.398(13) . ? 
O4 C47 1.431(13) . ? 
O5 C37 1.339(13) . ? 
O5 C36 1.433(14) . ? 
O6 C34 1.343(15) . ? 
O6 C35 1.403(14) . ? 
O7 C33 1.223(18) . ? 
O7 C32 1.393(14) . ? 
O8 C30 1.346(12) . ? 
O8 C31 1.489(12) . ? 
O9 C53 1.562(19) . ? 
O10 C100 1.51(2) . ? 
N1 C5 1.325(12) . ? 
N1 C1 1.333(12) . ? 
N2 C6 1.356(11) . ? 
N2 C10 1.353(10) . ? 
N2 C3 1.437(11) . ? 
N3 C15 1.336(12) . ? 
N3 C11 1.343(11) . ? 
N3 C18 1.454(11) . ? 
N4 C16 1.313(13) . ? 
N4 C20 1.303(13) . ? 
C1 C2 1.401(12) . ? 
C2 C3 1.365(13) . ? 
C3 C4 1.384(13) . ? 
C4 C5 1.397(13) . ? 
C6 C7 1.374(12) . ? 
C7 C8 1.390(12) . ? 
C8 C9 1.377(12) . ? 
C8 C13 1.485(12) . ? 
C9 C10 1.376(12) . ? 
C11 C12 1.368(12) . ? 
C12 C13 1.368(12) . ? 
C13 C14 1.386(12) . ? 
C14 C15 1.376(12) . ? 
C16 C17 1.414(15) . ? 
C17 C18 1.327(13) . ? 
C18 C19 1.348(13) . ? 
C19 C20 1.399(14) . ? 
C21 C22 1.326(14) . ? 
C21 C26 1.361(15) . ? 
C22 C23 1.403(14) . ? 
C23 C24 1.347(13) . ? 
C24 C25 1.472(15) . ? 
C25 C30 1.382(14) . ? 
C25 C26 1.390(15) . ? 
C26 C27 1.493(14) . ? 
C27 C28 1.313(15) . ? 
C28 C29 1.430(15) . ? 
C29 C30 1.389(15) . ? 
C31 C32 1.461(15) . ? 
C33 C34 1.42(2) . ? 
C35 C36 1.474(17) . ? 
C37 C42 1.405(15) . ? 
C37 C38 1.378(16) . ? 
C38 C39 1.387(16) . ? 
C39 C40 1.340(15) . ? 
C40 C41 1.465(14) . ? 
C41 C46 1.361(15) . ? 
C41 C42 1.387(14) . ? 
C42 C43 1.486(15) . ? 
C43 C44 1.335(15) . ? 
C44 C45 1.405(15) . ? 
C45 C46 1.367(14) . ? 
C47 C48 1.490(15) . ? 
C49 C50 1.482(14) . ? 
C51 C52 1.545(15) . ? 
 
loop_ 
 _geom_angle_atom_site_label_1 
 _geom_angle_atom_site_label_2 
 _geom_angle_atom_site_label_3 
 _geom_angle 
 _geom_angle_site_symmetry_1 
 _geom_angle_site_symmetry_3 
 _geom_angle_publ_flag 
N1 Cd1 I1 102.8(2) . . ? 
N1 Cd1 I2 101.5(2) . . ? 
I1 Cd1 I2 119.14(4) . . ? 
N1 Cd1 I3 98.7(2) . . ? 
I1 Cd1 I3 112.13(4) . . ? 
I2 Cd1 I3 117.98(4) . . ? 
N4 Cd2 I4 99.95(19) . . ? 
N4 Cd2 I6 100.5(2) . . ? 
I4 Cd2 I6 116.10(4) . . ? 
N4 Cd2 I5 103.01(19) . . ? 
I4 Cd2 I5 114.24(3) . . ? 
I6 Cd2 I5 118.70(4) . . ? 
C52 O1 C21 115.9(8) . . ? 
C50 O2 C51 112.9(8) . . ? 
C49 O3 C48 114.1(9) . . ? 
C46 O4 C47 118.5(9) . . ? 
C37 O5 C36 117.1(10) . . ? 
C34 O6 C35 116.6(11) . . ? 
C33 O7 C32 120.4(13) . . ? 
C30 O8 C31 117.5(8) . . ? 
C5 N1 C1 118.0(8) . . ? 
C5 N1 Cd1 118.1(7) . . ? 
C1 N1 Cd1 123.7(7) . . ? 
C6 N2 C10 120.8(8) . . ? 
C6 N2 C3 120.4(8) . . ? 
C10 N2 C3 118.8(7) . . ? 
C15 N3 C11 119.9(8) . . ? 
C15 N3 C18 118.8(8) . . ? 
C11 N3 C18 121.3(8) . . ? 
C16 N4 C20 117.5(9) . . ? 
C16 N4 Cd2 118.0(7) . . ? 
C20 N4 Cd2 124.3(7) . . ? 
N1 C1 C2 123.3(9) . . ? 
C3 C2 C1 117.5(9) . . ? 
C2 C3 C4 120.4(9) . . ? 
C2 C3 N2 119.5(8) . . ? 
C4 C3 N2 120.1(8) . . ? 
C5 C4 C3 117.7(9) . . ? 
N1 C5 C4 123.1(10) . . ? 
N2 C6 C7 120.7(9) . . ? 
C6 C7 C8 119.9(9) . . ? 
C9 C8 C7 117.6(8) . . ? 
C9 C8 C13 121.8(8) . . ? 
C7 C8 C13 120.6(8) . . ? 
C10 C9 C8 122.0(8) . . ? 
N2 C10 C9 118.9(8) . . ? 
N3 C11 C12 121.3(9) . . ? 
C11 C12 C13 120.1(9) . . ? 
C14 C13 C12 117.9(8) . . ? 
C14 C13 C8 120.7(8) . . ? 
C12 C13 C8 121.3(8) . . ? 
C15 C14 C13 120.2(9) . . ? 
N3 C15 C14 120.5(9) . . ? 
N4 C16 C17 122.9(10) . . ? 
C18 C17 C16 117.2(10) . . ? 
C19 C18 C17 121.6(10) . . ? 
C19 C18 N3 119.2(9) . . ? 
C17 C18 N3 119.2(9) . . ? 
C18 C19 C20 117.2(10) . . ? 
N4 C20 C19 123.5(10) . . ? 
C22 C21 C26 121.6(10) . . ? 
C22 C21 O1 123.7(11) . . ? 
C26 C21 O1 114.5(9) . . ? 
C21 C22 C23 121.3(10) . . ? 
C24 C23 C22 120.4(10) . . ? 
C23 C24 C25 118.4(10) . . ? 
C30 C25 C26 120.7(11) . . ? 
C30 C25 C24 121.1(11) . . ? 
C26 C25 C24 118.1(9) . . ? 
C21 C26 C25 120.3(10) . . ? 
C21 C26 C27 120.2(10) . . ? 
C25 C26 C27 119.5(11) . . ? 
C28 C27 C26 116.7(12) . . ? 
C27 C28 C29 124.1(11) . . ? 
C30 C29 C28 118.7(11) . . ? 
O8 C30 C25 114.3(11) . . ? 
O8 C30 C29 125.6(11) . . ? 
C25 C30 C29 120.1(12) . . ? 
C32 C31 O8 106.1(9) . . ? 
O7 C32 C31 108.4(10) . . ? 
O7 C33 C34 123.7(15) . . ? 
O6 C34 C33 118.0(13) . . ? 
O6 C35 C36 112.7(12) . . ? 
C35 C36 O5 106.6(12) . . ? 
O5 C37 C42 117.4(11) . . ? 
O5 C37 C38 128.9(12) . . ? 
C42 C37 C38 113.7(12) . . ? 
C37 C38 C39 123.6(12) . . ? 
C40 C39 C38 122.2(12) . . ? 
C39 C40 C41 118.4(12) . . ? 
C46 C41 C42 122.2(10) . . ? 
C46 C41 C40 121.6(11) . . ? 
C42 C41 C40 116.1(10) . . ? 
C37 C42 C41 125.8(11) . . ? 
C37 C42 C43 116.7(11) . . ? 
C41 C42 C43 117.5(10) . . ? 
C44 C43 C42 118.4(12) . . ? 
C43 C44 C45 121.2(11) . . ? 
C46 C45 C44 121.2(12) . . ? 
C41 C46 C45 119.3(12) . . ? 
C41 C46 O4 115.4(10) . . ? 
C45 C46 O4 125.2(12) . . ? 
O4 C47 C48 107.9(10) . . ? 
O3 C48 C47 114.7(9) . . ? 
O3 C49 C50 111.0(9) . . ? 
O2 C50 C49 108.7(8) . . ? 
O2 C51 C52 107.7(9) . . ? 
O1 C52 C51 106.7(10) . . ? 
 
_diffrn_measured_fraction_theta_max    0.993 
_diffrn_reflns_theta_full              30.03 
_diffrn_measured_fraction_theta_full   0.993 
_refine_diff_density_max    2.074 
_refine_diff_density_min   -2.337 
_refine_diff_density_rms    0.192 

#===END

data_1[Hg2Cl6] 
 
_audit_creation_method            SHELXL-97 
_chemical_name_systematic 
; 
 ? 
; 
_chemical_name_common             ? 
_chemical_melting_point           ? 
_chemical_formula_moiety          ? 
_chemical_formula_sum 
 'C52 H52 Cl6 Hg2 N4 O8' 
_chemical_formula_weight          1474.86 
 
loop_ 
 _atom_type_symbol 
 _atom_type_description 
 _atom_type_scat_dispersion_real 
 _atom_type_scat_dispersion_imag 
 _atom_type_scat_source 
 'C'  'C'   0.0033   0.0016 
 'International Tables Vol C Tables 4.2.6.8 and 6.1.1.4' 
 'H'  'H'   0.0000   0.0000 
 'International Tables Vol C Tables 4.2.6.8 and 6.1.1.4' 
 'N'  'N'   0.0061   0.0033 
 'International Tables Vol C Tables 4.2.6.8 and 6.1.1.4' 
 'O'  'O'   0.0106   0.0060 
 'International Tables Vol C Tables 4.2.6.8 and 6.1.1.4' 
 'Cl'  'Cl'   0.1484   0.1585 
 'International Tables Vol C Tables 4.2.6.8 and 6.1.1.4' 
 'Hg'  'Hg'  -2.3894   9.2266 
 'International Tables Vol C Tables 4.2.6.8 and 6.1.1.4' 
 
_symmetry_cell_setting           'Triclinic'
_symmetry_space_group_name_H-M   'P-1   '
 
loop_ 
 _symmetry_equiv_pos_as_xyz 
 'x, y, z' 
 '-x, -y, -z' 
 
_cell_length_a                    9.7025(2) 
_cell_length_b                    11.5838(3) 
_cell_length_c                    12.6269(3) 
_cell_angle_alpha                 98.5500(10) 
_cell_angle_beta                  103.9650(10) 
_cell_angle_gamma                 101.3510(10) 
_cell_volume                      1321.26(5) 
_cell_formula_units_Z             1 
_cell_measurement_temperature     100(2) 
_cell_measurement_reflns_used     9936
_cell_measurement_theta_min       2.23
_cell_measurement_theta_max       23.04
 
_exptl_crystal_description        'block'
_exptl_crystal_colour             'blue'
_exptl_crystal_size_max           0.16 
_exptl_crystal_size_mid           0.10 
_exptl_crystal_size_min           0.05 
_exptl_crystal_density_meas       ? 
_exptl_crystal_density_diffrn     1.854 
_exptl_crystal_density_method     'not measured' 
_exptl_crystal_F_000              718 
_exptl_absorpt_coefficient_mu     6.164 
_exptl_absorpt_correction_type    multi-scan 
_exptl_absorpt_correction_T_min   0.5757 
_exptl_absorpt_correction_T_max   0.7461
_exptl_absorpt_process_details    ? 
 
_exptl_special_details 
; 
 ? 
; 
 
_diffrn_ambient_temperature       100(2) 
_diffrn_radiation_wavelength      0.71073 
_diffrn_radiation_type            MoK\a 
_diffrn_radiation_source          'fine-focus sealed tube' 
_diffrn_radiation_monochromator   graphite 
_diffrn_measurement_device_type   'Bruker APEX-II CCD'
_diffrn_measurement_method        '\f and \w scans'
_diffrn_detector_area_resol_mean  ? 
_diffrn_reflns_number             57649 
_diffrn_reflns_av_R_equivalents   0.0745 
_diffrn_reflns_av_sigmaI/netI     0.0531 
_diffrn_reflns_limit_h_min        -13 
_diffrn_reflns_limit_h_max        13 
_diffrn_reflns_limit_k_min        -16 
_diffrn_reflns_limit_k_max        16 
_diffrn_reflns_limit_l_min        -17 
_diffrn_reflns_limit_l_max        17 
_diffrn_reflns_theta_min          1.70 
_diffrn_reflns_theta_max          30.03 
_reflns_number_total              7696 
_reflns_number_gt                 6137 
_reflns_threshold_expression      >2sigma(I) 
 
_computing_data_collection      'Bruker APEX2'
_computing_cell_refinement      'Bruker SAINT'
_computing_data_reduction       'Bruker SAINT'
_computing_structure_solution   'SHELXS-97 (Sheldrick, 2008)'
_computing_structure_refinement 'SHELXL-97 (Sheldrick, 2008)'
_computing_molecular_graphics   'Bruker SHELXTL'
_computing_publication_material 'Bruker SHELXTL'
 
_refine_special_details 
; 
 Refinement of F^2^ against ALL reflections.  The weighted R-factor wR and 
 goodness of fit S are based on F^2^, conventional R-factors R are based 
 on F, with F set to zero for negative F^2^. The threshold expression of 
 F^2^ > 2sigma(F^2^) is used only for calculating R-factors(gt) etc. and is 
 not relevant to the choice of reflections for refinement.  R-factors based 
 on F^2^ are statistically about twice as large as those based on F, and R- 
 factors based on ALL data will be even larger. 
; 
 
_refine_ls_structure_factor_coef  Fsqd  
_refine_ls_matrix_type            full 
_refine_ls_weighting_scheme       calc  
_refine_ls_weighting_details 
 'calc w=1/[\s^2^(Fo^2^)+(0.0633P)^2^+0.0000P] where P=(Fo^2^+2Fc^2^)/3' 
_atom_sites_solution_primary      direct 
_atom_sites_solution_secondary    difmap 
_atom_sites_solution_hydrogens    geom 
_refine_ls_hydrogen_treatment     constr 
_refine_ls_extinction_method      none 
_refine_ls_extinction_coef        ? 
_refine_ls_number_reflns          7696 
_refine_ls_number_parameters      325 
_refine_ls_number_restraints      0 
_refine_ls_R_factor_all           0.0626 
_refine_ls_R_factor_gt            0.0426 
_refine_ls_wR_factor_ref          0.1083 
_refine_ls_wR_factor_gt           0.0986 
_refine_ls_goodness_of_fit_ref    1.038 
_refine_ls_restrained_S_all       1.038 
_refine_ls_shift/su_max           0.001 
_refine_ls_shift/su_mean          0.000 
 
loop_ 
 _atom_site_label 
 _atom_site_type_symbol 
 _atom_site_fract_x 
 _atom_site_fract_y 
 _atom_site_fract_z 
 _atom_site_U_iso_or_equiv 
 _atom_site_adp_type 
 _atom_site_occupancy 
 _atom_site_symmetry_multiplicity 
 _atom_site_calc_flag 
 _atom_site_refinement_flags 
 _atom_site_disorder_assembly 
 _atom_site_disorder_group 
Hg1 Hg 0.56784(2) 0.659409(17) 0.580721(15) 0.02871(7) Uani 1 1 d . . . 
Cl1 Cl 0.43178(14) 0.46099(11) 0.61901(10) 0.0309(3) Uani 1 1 d . . . 
Cl2 Cl 0.81394(14) 0.68854(13) 0.69223(10) 0.0350(3) Uani 1 1 d . . . 
Cl3 Cl 0.40842(17) 0.78684(14) 0.53602(12) 0.0436(3) Uani 1 1 d . . . 
O1 O 0.1239(4) 0.5520(3) 0.7863(3) 0.0304(7) Uani 1 1 d . . . 
O2 O 0.0670(4) 0.3226(4) 0.6260(3) 0.0395(9) Uani 1 1 d . . . 
O3 O 0.8388(4) 0.8998(4) 1.3697(3) 0.0355(8) Uani 1 1 d . . . 
O4 O 0.5416(4) 0.8544(4) 1.2058(3) 0.0361(8) Uani 1 1 d . . . 
N1 N -0.2046(5) -0.0050(4) 0.8858(4) 0.0387(11) Uani 1 1 d . . . 
N2 N 0.1855(5) 0.2656(4) 0.9481(3) 0.0263(8) Uani 1 1 d . . . 
C1 C -0.1511(6) 0.0774(5) 0.9812(5) 0.0359(12) Uani 1 1 d . . . 
H1 H -0.2020 0.0733 1.0347 0.043 Uiso 1 1 calc R . . 
C2 C -0.0252(5) 0.1682(5) 1.0054(4) 0.0312(11) Uani 1 1 d . . . 
H2 H 0.0064 0.2244 1.0724 0.037 Uiso 1 1 calc R . . 
C3 C 0.0518(5) 0.1728(4) 0.9270(4) 0.0282(10) Uani 1 1 d . . . 
C4 C 0.0007(6) 0.0890(4) 0.8274(4) 0.0307(11) Uani 1 1 d . . . 
H4 H 0.0511 0.0899 0.7735 0.037 Uiso 1 1 calc R . . 
C5 C -0.1292(7) 0.0032(5) 0.8113(5) 0.0400(13) Uani 1 1 d . . . 
H5 H -0.1655 -0.0521 0.7437 0.048 Uiso 1 1 calc R . . 
C6 C 0.2729(5) 0.3096(5) 1.0536(4) 0.0273(10) Uani 1 1 d . . . 
H6 H 0.2502 0.2762 1.1117 0.033 Uiso 1 1 calc R . . 
C7 C 0.3936(5) 0.4023(4) 1.0758(4) 0.0265(10) Uani 1 1 d . . . 
H7 H 0.4495 0.4338 1.1492 0.032 Uiso 1 1 calc R . . 
C8 C 0.4347(5) 0.4507(4) 0.9894(4) 0.0255(9) Uani 1 1 d . . . 
C9 C 0.3464(6) 0.3993(4) 0.8815(4) 0.0279(10) Uani 1 1 d . . . 
H9 H 0.3725 0.4252 0.8211 0.033 Uiso 1 1 calc R . . 
C10 C 0.2208(6) 0.3106(4) 0.8632(4) 0.0299(10) Uani 1 1 d . . . 
H10 H 0.1595 0.2813 0.7911 0.036 Uiso 1 1 calc R . . 
C11 C 0.2353(6) 0.6506(5) 0.8439(4) 0.0295(10) Uani 1 1 d . . . 
C12 C 0.3165(6) 0.7283(5) 0.7971(5) 0.0344(11) Uani 1 1 d . . . 
H12 H 0.2938 0.7197 0.7200 0.041 Uiso 1 1 calc R . . 
C13 C 0.4348(6) 0.8216(5) 0.8666(5) 0.0322(11) Uani 1 1 d . . . 
H13 H 0.4892 0.8739 0.8342 0.039 Uiso 1 1 calc R . . 
C14 C 0.4711(6) 0.8367(5) 0.9797(5) 0.0350(12) Uani 1 1 d . . . 
H14 H 0.5510 0.8973 1.0237 0.042 Uiso 1 1 calc R . . 
C15 C 0.3859(6) 0.7591(5) 1.0302(4) 0.0303(10) Uani 1 1 d . . . 
C16 C 0.2649(5) 0.6664(5) 0.9618(4) 0.0294(10) Uani 1 1 d . . . 
C17 C 0.1752(6) 0.5916(5) 1.0118(4) 0.0335(11) Uani 1 1 d . . . 
H17 H 0.0963 0.5304 0.9673 0.040 Uiso 1 1 calc R . . 
C18 C 0.2058(6) 0.6101(6) 1.1256(5) 0.0386(12) Uani 1 1 d . . . 
H18 H 0.1451 0.5629 1.1577 0.046 Uiso 1 1 calc R . . 
C19 C 0.3274(6) 0.6993(5) 1.1946(5) 0.0357(12) Uani 1 1 d . . . 
H19 H 0.3473 0.7104 1.2717 0.043 Uiso 1 1 calc R . . 
C20 C 0.4167(6) 0.7702(5) 1.1475(4) 0.0318(11) Uani 1 1 d . . . 
C21 C 0.5735(7) 0.8794(6) 1.3262(5) 0.0447(14) Uani 1 1 d . . . 
H21A H 0.5697 0.8052 1.3535 0.054 Uiso 1 1 calc R . . 
H21B H 0.5020 0.9178 1.3490 0.054 Uiso 1 1 calc R . . 
C22 C 0.7223(7) 0.9605(5) 1.3722(5) 0.0426(13) Uani 1 1 d . . . 
H22A H 0.7315 1.0236 1.3299 0.051 Uiso 1 1 calc R . . 
H22B H 0.7339 0.9983 1.4488 0.051 Uiso 1 1 calc R . . 
C23 C 0.8801(7) 0.8504(5) 1.4656(4) 0.0393(13) Uani 1 1 d . . . 
H23A H 0.7952 0.7958 1.4736 0.047 Uiso 1 1 calc R . . 
H23B H 0.9173 0.9144 1.5316 0.047 Uiso 1 1 calc R . . 
C24 C 0.0052(7) 0.2156(5) 0.5448(5) 0.0412(14) Uani 1 1 d . . . 
H24A H -0.0373 0.2343 0.4736 0.049 Uiso 1 1 calc R . . 
H24B H -0.0721 0.1653 0.5658 0.049 Uiso 1 1 calc R . . 
C25 C -0.0197(6) 0.4102(5) 0.6208(5) 0.0374(12) Uani 1 1 d . . . 
H25A H -0.0889 0.3956 0.6642 0.045 Uiso 1 1 calc R . . 
H25B H -0.0741 0.4047 0.5442 0.045 Uiso 1 1 calc R . . 
C26 C 0.0825(6) 0.5333(5) 0.6671(4) 0.0333(11) Uani 1 1 d . . . 
H26A H 0.1687 0.5386 0.6403 0.040 Uiso 1 1 calc R . . 
H26B H 0.0340 0.5945 0.6431 0.040 Uiso 1 1 calc R . . 
 
loop_ 
 _atom_site_aniso_label 
 _atom_site_aniso_U_11 
 _atom_site_aniso_U_22 
 _atom_site_aniso_U_33 
 _atom_site_aniso_U_23 
 _atom_site_aniso_U_13 
 _atom_site_aniso_U_12 
Hg1 0.02356(10) 0.03336(12) 0.02688(11) 0.00432(7) 0.00673(7) 0.00338(7) 
Cl1 0.0347(6) 0.0306(6) 0.0235(5) 0.0013(5) 0.0117(5) -0.0019(5) 
Cl2 0.0240(6) 0.0482(8) 0.0273(6) 0.0009(5) 0.0045(5) 0.0048(5) 
Cl3 0.0492(8) 0.0510(9) 0.0435(8) 0.0172(6) 0.0210(7) 0.0265(7) 
O1 0.0260(18) 0.037(2) 0.0265(17) 0.0081(15) 0.0069(14) 0.0023(15) 
O2 0.035(2) 0.039(2) 0.0302(19) 0.0010(16) -0.0060(16) -0.0014(17) 
O3 0.0301(19) 0.041(2) 0.0271(18) 0.0035(15) 0.0042(15) -0.0027(16) 
O4 0.0297(19) 0.041(2) 0.0311(19) 0.0032(16) 0.0042(15) 0.0017(16) 
N1 0.032(2) 0.037(3) 0.043(3) 0.010(2) 0.006(2) 0.004(2) 
N2 0.028(2) 0.026(2) 0.0246(19) 0.0052(16) 0.0055(16) 0.0080(17) 
C1 0.026(3) 0.043(3) 0.044(3) 0.016(3) 0.013(2) 0.012(2) 
C2 0.025(2) 0.036(3) 0.032(3) 0.006(2) 0.005(2) 0.010(2) 
C3 0.028(2) 0.026(2) 0.031(2) 0.012(2) 0.005(2) 0.007(2) 
C4 0.034(3) 0.025(3) 0.031(3) 0.004(2) 0.009(2) 0.004(2) 
C5 0.044(3) 0.029(3) 0.041(3) 0.005(2) 0.010(3) -0.001(2) 
C6 0.029(2) 0.031(3) 0.022(2) 0.0034(19) 0.0082(19) 0.008(2) 
C7 0.028(2) 0.031(3) 0.019(2) 0.0042(18) 0.0072(18) 0.006(2) 
C8 0.026(2) 0.027(2) 0.023(2) 0.0021(18) 0.0063(18) 0.0093(19) 
C9 0.034(3) 0.026(2) 0.024(2) 0.0048(19) 0.011(2) 0.006(2) 
C10 0.035(3) 0.027(3) 0.024(2) 0.0072(19) 0.005(2) 0.003(2) 
C11 0.026(2) 0.030(3) 0.032(3) 0.006(2) 0.009(2) 0.005(2) 
C12 0.038(3) 0.033(3) 0.037(3) 0.010(2) 0.014(2) 0.013(2) 
C13 0.033(3) 0.027(3) 0.040(3) 0.008(2) 0.016(2) 0.003(2) 
C14 0.035(3) 0.031(3) 0.040(3) 0.006(2) 0.010(2) 0.012(2) 
C15 0.027(2) 0.033(3) 0.033(3) 0.005(2) 0.012(2) 0.010(2) 
C16 0.027(2) 0.029(3) 0.032(3) 0.004(2) 0.009(2) 0.008(2) 
C17 0.033(3) 0.032(3) 0.033(3) 0.002(2) 0.010(2) 0.004(2) 
C18 0.033(3) 0.047(3) 0.033(3) 0.003(2) 0.012(2) 0.004(2) 
C19 0.034(3) 0.043(3) 0.029(3) 0.004(2) 0.012(2) 0.005(2) 
C20 0.027(2) 0.031(3) 0.033(3) 0.001(2) 0.007(2) 0.006(2) 
C21 0.035(3) 0.054(4) 0.036(3) -0.005(3) 0.011(2) -0.004(3) 
C22 0.040(3) 0.039(3) 0.042(3) -0.002(3) 0.011(3) 0.004(3) 
C23 0.047(3) 0.033(3) 0.026(3) 0.002(2) 0.007(2) -0.010(2) 
C24 0.041(3) 0.039(3) 0.029(3) 0.005(2) -0.003(2) -0.006(3) 
C25 0.031(3) 0.050(3) 0.028(3) 0.009(2) 0.005(2) 0.006(2) 
C26 0.034(3) 0.041(3) 0.027(2) 0.009(2) 0.010(2) 0.009(2) 
 
_geom_special_details 
; 
 All esds (except the esd in the dihedral angle between two l.s. planes) 
 are estimated using the full covariance matrix.  The cell esds are taken 
 into account individually in the estimation of esds in distances, angles 
 and torsion angles; correlations between esds in cell parameters are only 
 used when they are defined by crystal symmetry.  An approximate (isotropic) 
 treatment of cell esds is used for estimating esds involving l.s. planes. 
; 
 
loop_ 
 _geom_bond_atom_site_label_1 
 _geom_bond_atom_site_label_2 
 _geom_bond_distance 
 _geom_bond_site_symmetry_2 
 _geom_bond_publ_flag 
Hg1 Cl3 2.3697(13) . ? 
Hg1 Cl2 2.3910(12) . ? 
Hg1 Cl1 2.5891(12) . ? 
Hg1 Cl1 2.6956(12) 2_666 ? 
Cl1 Hg1 2.6955(12) 2_666 ? 
O1 C11 1.375(6) . ? 
O1 C26 1.432(6) . ? 
O2 C24 1.408(7) . ? 
O2 C25 1.439(7) . ? 
O3 C23 1.420(6) . ? 
O3 C22 1.447(7) . ? 
O4 C20 1.362(6) . ? 
O4 C21 1.449(7) . ? 
N1 C5 1.328(7) . ? 
N1 C1 1.339(8) . ? 
N2 C10 1.346(6) . ? 
N2 C6 1.355(6) . ? 
N2 C3 1.452(6) . ? 
C1 C2 1.382(8) . ? 
C2 C3 1.378(7) . ? 
C3 C4 1.384(7) . ? 
C4 C5 1.393(8) . ? 
C6 C7 1.364(7) . ? 
C7 C8 1.403(7) . ? 
C8 C9 1.393(7) . ? 
C8 C8 1.468(10) 2_667 ? 
C9 C10 1.377(7) . ? 
C11 C12 1.373(7) . ? 
C11 C16 1.423(7) . ? 
C12 C13 1.414(8) . ? 
C13 C14 1.361(8) . ? 
C14 C15 1.425(8) . ? 
C15 C20 1.419(7) . ? 
C15 C16 1.420(7) . ? 
C16 C17 1.428(7) . ? 
C17 C18 1.369(7) . ? 
C18 C19 1.405(8) . ? 
C19 C20 1.375(7) . ? 
C21 C22 1.485(8) . ? 
C23 C24 1.488(9) 2_667 ? 
C24 C23 1.488(9) 2_667 ? 
C25 C26 1.509(8) . ? 
 
loop_ 
 _geom_angle_atom_site_label_1 
 _geom_angle_atom_site_label_2 
 _geom_angle_atom_site_label_3 
 _geom_angle 
 _geom_angle_site_symmetry_1 
 _geom_angle_site_symmetry_3 
 _geom_angle_publ_flag 
Cl3 Hg1 Cl2 135.06(6) . . ? 
Cl3 Hg1 Cl1 111.40(5) . . ? 
Cl2 Hg1 Cl1 103.57(5) . . ? 
Cl3 Hg1 Cl1 104.24(5) . 2_666 ? 
Cl2 Hg1 Cl1 103.34(4) . 2_666 ? 
Cl1 Hg1 Cl1 89.55(4) . 2_666 ? 
Hg1 Cl1 Hg1 90.46(4) . 2_666 ? 
C11 O1 C26 117.1(4) . . ? 
C24 O2 C25 114.7(4) . . ? 
C23 O3 C22 112.8(4) . . ? 
C20 O4 C21 117.0(4) . . ? 
C5 N1 C1 116.3(5) . . ? 
C10 N2 C6 119.8(5) . . ? 
C10 N2 C3 120.0(4) . . ? 
C6 N2 C3 120.1(4) . . ? 
N1 C1 C2 124.3(5) . . ? 
C3 C2 C1 117.8(5) . . ? 
C2 C3 C4 119.8(5) . . ? 
C2 C3 N2 120.3(5) . . ? 
C4 C3 N2 119.9(5) . . ? 
C3 C4 C5 117.4(5) . . ? 
N1 C5 C4 124.4(5) . . ? 
N2 C6 C7 120.9(5) . . ? 
C6 C7 C8 120.9(5) . . ? 
C9 C8 C7 116.6(5) . . ? 
C9 C8 C8 121.3(5) . 2_667 ? 
C7 C8 C8 122.1(5) . 2_667 ? 
C10 C9 C8 120.7(5) . . ? 
N2 C10 C9 121.0(5) . . ? 
C12 C11 O1 125.7(5) . . ? 
C12 C11 C16 120.6(5) . . ? 
O1 C11 C16 113.8(4) . . ? 
C11 C12 C13 119.7(5) . . ? 
C14 C13 C12 121.7(5) . . ? 
C13 C14 C15 119.6(5) . . ? 
C20 C15 C16 117.8(5) . . ? 
C20 C15 C14 122.7(5) . . ? 
C16 C15 C14 119.5(5) . . ? 
C15 C16 C11 118.8(5) . . ? 
C15 C16 C17 119.9(5) . . ? 
C11 C16 C17 121.3(5) . . ? 
C18 C17 C16 119.8(5) . . ? 
C17 C18 C19 121.1(5) . . ? 
C20 C19 C18 119.7(5) . . ? 
O4 C20 C19 124.8(5) . . ? 
O4 C20 C15 113.6(5) . . ? 
C19 C20 C15 121.6(5) . . ? 
O4 C21 C22 107.6(5) . . ? 
O3 C22 C21 113.7(5) . . ? 
O3 C23 C24 110.0(5) . 2_667 ? 
O2 C24 C23 109.9(5) . 2_667 ? 
O2 C25 C26 108.0(4) . . ? 
O1 C26 C25 108.3(4) . . ? 
 
_diffrn_measured_fraction_theta_max    0.996 
_diffrn_reflns_theta_full              30.03 
_diffrn_measured_fraction_theta_full   0.996 
_refine_diff_density_max    3.296 
_refine_diff_density_min   -1.674 
_refine_diff_density_rms    0.194 

#===END
 
data_2+CdI4+0.5CHCl3+2CH3OH 
 
_audit_creation_method            SHELXL-97 
_chemical_name_systematic 
; 
 ? 
; 
_chemical_name_common             ? 
_chemical_melting_point           ? 
_chemical_formula_moiety          ? 
_chemical_formula_sum 
 'C117 H137 Cd2 Cl3 I8 N8 O24' 
_chemical_formula_weight          3385.70 
 
loop_ 
 _atom_type_symbol 
 _atom_type_description 
 _atom_type_scat_dispersion_real 
 _atom_type_scat_dispersion_imag 
 _atom_type_scat_source 
 'C'  'C'   0.0033   0.0016 
 'International Tables Vol C Tables 4.2.6.8 and 6.1.1.4' 
 'H'  'H'   0.0000   0.0000 
 'International Tables Vol C Tables 4.2.6.8 and 6.1.1.4' 
 'Cd'  'Cd'  -0.8075   1.2024 
 'International Tables Vol C Tables 4.2.6.8 and 6.1.1.4' 
 'Cl'  'Cl'   0.1484   0.1585 
 'International Tables Vol C Tables 4.2.6.8 and 6.1.1.4' 
 'I'  'I'  -0.4742   1.8119 
 'International Tables Vol C Tables 4.2.6.8 and 6.1.1.4' 
 'N'  'N'   0.0061   0.0033 
 'International Tables Vol C Tables 4.2.6.8 and 6.1.1.4' 
 'O'  'O'   0.0106   0.0060 
 'International Tables Vol C Tables 4.2.6.8 and 6.1.1.4' 
 
_symmetry_cell_setting           'Triclinic'
_symmetry_space_group_name_H-M   'P-1   '
 
loop_ 
 _symmetry_equiv_pos_as_xyz 
 'x, y, z' 
 '-x, -y, -z' 
 
_cell_length_a                    11.5238(4) 
_cell_length_b                    13.9373(4) 
_cell_length_c                    20.2886(7) 
_cell_angle_alpha                 86.472(2) 
_cell_angle_beta                  88.951(2) 
_cell_angle_gamma                 76.119(2) 
_cell_volume                      3157.39(18) 
_cell_formula_units_Z             1 
_cell_measurement_temperature     100(2) 
_cell_measurement_reflns_used     4672
_cell_measurement_theta_min       2.44
_cell_measurement_theta_max       18.58
 
_exptl_crystal_description       'block'
_exptl_crystal_colour            'orange-red' 
_exptl_crystal_size_max           0.17 
_exptl_crystal_size_mid           0.10 
_exptl_crystal_size_min           0.09 
_exptl_crystal_density_meas       ? 
_exptl_crystal_density_diffrn     1.781 
_exptl_crystal_density_method     'not measured' 
_exptl_crystal_F_000              1658 
_exptl_absorpt_coefficient_mu     2.426 
_exptl_absorpt_correction_type    multi-scan 
_exptl_absorpt_correction_T_min   0.6738 
_exptl_absorpt_correction_T_max   0.7457 
_exptl_absorpt_process_details    ? 
 
_exptl_special_details 
; 
 ? 
; 
 
_diffrn_ambient_temperature       100(2) 
_diffrn_radiation_wavelength      0.71073 
_diffrn_radiation_type            MoK\a 
_diffrn_radiation_source          'fine-focus sealed tube' 
_diffrn_radiation_monochromator   graphite 
_diffrn_measurement_device_type  'Bruker APEX-II CCD'
_diffrn_measurement_method       '\f and \w scans'
_diffrn_detector_area_resol_mean  ? 
_diffrn_reflns_number             83396 
_diffrn_reflns_av_R_equivalents   0.1541 
_diffrn_reflns_av_sigmaI/netI     0.1279 
_diffrn_reflns_limit_h_min        -15 
_diffrn_reflns_limit_h_max        15 
_diffrn_reflns_limit_k_min        -18 
_diffrn_reflns_limit_k_max        18 
_diffrn_reflns_limit_l_min        -26 
_diffrn_reflns_limit_l_max        26 
_diffrn_reflns_theta_min          1.76 
_diffrn_reflns_theta_max          27.88 
_reflns_number_total              15025 
_reflns_number_gt                 7194 
_reflns_threshold_expression      >2sigma(I) 
 
_computing_data_collection      'Bruker APEX2'
_computing_cell_refinement      'Bruker SAINT'
_computing_data_reduction       'Bruker SAINT'
_computing_structure_solution   'SHELXS-97 (Sheldrick, 2008)'
_computing_structure_refinement 'SHELXL-97 (Sheldrick, 2008)'
_computing_molecular_graphics   'Bruker SHELXTL'
_computing_publication_material 'Bruker SHELXTL'

 
_refine_special_details 
; 
 Refinement of F^2^ against ALL reflections.  The weighted R-factor wR and 
 goodness of fit S are based on F^2^, conventional R-factors R are based 
 on F, with F set to zero for negative F^2^. The threshold expression of 
 F^2^ > 2sigma(F^2^) is used only for calculating R-factors(gt) etc. and is 
 not relevant to the choice of reflections for refinement.  R-factors based 
 on F^2^ are statistically about twice as large as those based on F, and R- 
 factors based on ALL data will be even larger. 
; 
 
_refine_ls_structure_factor_coef  Fsqd  
_refine_ls_matrix_type            full 
_refine_ls_weighting_scheme       calc  
_refine_ls_weighting_details 
 'calc w=1/[\s^2^(Fo^2^)+(0.1172P)^2^+99.5672P] where P=(Fo^2^+2Fc^2^)/3' 
_atom_sites_solution_primary      direct 
_atom_sites_solution_secondary    difmap 
_atom_sites_solution_hydrogens    geom 
_refine_ls_hydrogen_treatment     constr 
_refine_ls_extinction_method      none 
_refine_ls_extinction_coef        ? 
_refine_ls_number_reflns          15025 
_refine_ls_number_parameters      767 
_refine_ls_number_restraints      82 
_refine_ls_R_factor_all           0.1849 
_refine_ls_R_factor_gt            0.0859 
_refine_ls_wR_factor_ref          0.2800 
_refine_ls_wR_factor_gt           0.2105 
_refine_ls_goodness_of_fit_ref    0.822 
_refine_ls_restrained_S_all       0.887 
_refine_ls_shift/su_max           3.093 
_refine_ls_shift/su_mean          0.046 
 
loop_ 
 _atom_site_label 
 _atom_site_type_symbol 
 _atom_site_fract_x 
 _atom_site_fract_y 
 _atom_site_fract_z 
 _atom_site_U_iso_or_equiv 
 _atom_site_adp_type 
 _atom_site_occupancy 
 _atom_site_symmetry_multiplicity 
 _atom_site_calc_flag 
 _atom_site_refinement_flags 
 _atom_site_disorder_assembly 
 _atom_site_disorder_group 
I1 I 0.57764(10) 0.70783(8) 0.72773(5) 0.0528(3) Uani 1 1 d . A 4 
I2 I 0.51806(9) 1.03486(8) 0.68404(5) 0.0516(3) Uani 1 1 d . A 4 
I3A I 0.9077(4) 0.8324(3) 0.70636(16) 0.0478(8) Uani 0.50 1 d PD A 1 
I4A I 0.6575(2) 0.8819(3) 0.88463(19) 0.0371(6) Uani 0.50 1 d PD A 1 
I3B I 0.8916(4) 0.8389(3) 0.6757(2) 0.0672(12) Uani 0.50 1 d PD A 2 
I4B I 0.7084(4) 0.8726(4) 0.8732(2) 0.0824(14) Uani 0.50 1 d PD A 2 
Cd1 Cd 0.67055(10) 0.86902(8) 0.74359(6) 0.0475(3) Uani 1 1 d D . . 
Cl1 Cl 0.2269(13) 0.8781(11) 0.6591(8) 0.107(4) Uani 0.50 1 d PD B 3 
Cl2 Cl 0.2490(15) 1.0228(12) 0.5508(8) 0.128(5) Uani 0.50 1 d PD B 3 
Cl3 Cl 0.3730(15) 0.8121(13) 0.5488(9) 0.136(6) Uani 0.50 1 d PD B 3 
C40 C 0.321(3) 0.9137(16) 0.5975(13) 0.13(3) Uani 0.50 1 d PD B 3 
H40 H 0.3896 0.9271 0.6194 0.158 Uiso 0.50 1 calc PR B 3 
O500 O 0.286(3) 1.048(3) 0.470(2) 0.111(11) Uani 0.50 1 d PDU C 4 
H500 H 0.2994 1.0799 0.4372 0.167 Uiso 0.50 1 calc PR C 4 
C500 C 0.397(5) 0.995(6) 0.499(4) 0.18(3) Uani 0.50 1 d PDU C 4 
H50A H 0.4572 1.0307 0.4896 0.264 Uiso 0.50 1 calc PR C 4 
H50B H 0.4210 0.9305 0.4816 0.264 Uiso 0.50 1 calc PR C 4 
H50C H 0.3875 0.9869 0.5464 0.264 Uiso 0.50 1 calc PR C 4 
O600 O 0.190(6) 0.875(6) 0.544(3) 0.22(3) Uani 0.50 1 d PDU D 4 
H600 H 0.2257 0.8727 0.5083 0.328 Uiso 0.50 1 calc PR D 4 
C600 C 0.275(7) 0.861(6) 0.598(3) 0.22(4) Uani 0.50 1 d PDU D 4 
H60A H 0.2797 0.9242 0.6118 0.334 Uiso 0.50 1 calc PR D 4 
H60B H 0.3522 0.8258 0.5827 0.334 Uiso 0.50 1 calc PR D 4 
H60C H 0.2491 0.8233 0.6338 0.334 Uiso 0.50 1 calc PR D 4 
O1 O 0.2215(10) 0.3401(7) 0.6722(5) 0.052(3) Uani 1 1 d . . . 
O2 O 0.3734(11) 0.5617(7) 0.4370(5) 0.056(3) Uani 1 1 d . . . 
O3 O 0.3259(10) 0.7156(7) 0.3324(5) 0.049(3) Uani 1 1 d . . . 
O4 O 0.0805(10) 0.8190(7) 0.3437(5) 0.052(3) Uani 1 1 d . . . 
O5 O -0.0951(10) 0.7908(8) 0.2564(5) 0.056(3) Uani 1 1 d . . . 
O6 O 0.911(3) 0.8073(16) 0.4996(11) 0.156(9) Uani 1 1 d D . . 
H6A H 0.8801 0.7952 0.5350 0.234 Uiso 1 1 calc R . . 
N1 N 0.7858(12) 0.4824(9) 0.8628(6) 0.046(3) Uani 1 1 d . . . 
N2 N 0.8977(11) 0.4888(7) 0.6631(5) 0.036(3) Uani 1 1 d . . . 
N3 N 0.730(2) -0.0460(15) 0.1136(8) 0.112(8) Uani 1 1 d . . . 
N4 N 0.6112(12) 0.2525(10) 0.0564(6) 0.055(4) Uani 1 1 d . . . 
C1 C 0.8459(14) 0.5451(11) 0.8390(8) 0.050(4) Uani 1 1 d . . . 
H1 H 0.8636 0.5888 0.8679 0.060 Uiso 1 1 calc R . . 
C2 C 0.8861(12) 0.5521(10) 0.7734(6) 0.036(3) Uani 1 1 d . . . 
H2 H 0.9261 0.6000 0.7588 0.043 Uiso 1 1 calc R . . 
C3 C 0.8632(12) 0.4843(9) 0.7320(7) 0.037(3) Uani 1 1 d . . . 
C4 C 0.8036(15) 0.4146(10) 0.7558(7) 0.048(4) Uani 1 1 d . . . 
H4 H 0.7885 0.3673 0.7289 0.058 Uiso 1 1 calc R . . 
C5 C 0.7677(15) 0.4173(10) 0.8201(7) 0.049(4) Uani 1 1 d . . . 
H5 H 0.7274 0.3701 0.8358 0.059 Uiso 1 1 calc R . . 
C6 C 0.8913(13) 0.5780(10) 0.6303(7) 0.038(3) Uani 1 1 d . . . 
H6 H 0.8598 0.6358 0.6517 0.046 Uiso 1 1 calc R . . 
C7 C 0.9298(13) 0.5842(10) 0.5674(7) 0.041(3) Uani 1 1 d . . . 
H7 H 0.9248 0.6458 0.5457 0.049 Uiso 1 1 calc R . . 
C8 C 0.9780(14) 0.4963(9) 0.5346(6) 0.039(3) Uani 1 1 d . . . 
C9 C 0.9749(17) 0.4070(10) 0.5686(7) 0.053(4) Uani 1 1 d . . . 
H9 H 0.9977 0.3480 0.5475 0.064 Uiso 1 1 calc R . . 
C10 C 0.9386(14) 0.4064(10) 0.6323(7) 0.044(4) Uani 1 1 d . . . 
H10 H 0.9425 0.3459 0.6553 0.053 Uiso 1 1 calc R . . 
C11 C 0.691(2) 0.0189(19) 0.1580(10) 0.103(9) Uani 1 1 d . . . 
H11 H 0.6907 -0.0032 0.2022 0.124 Uiso 1 1 calc R . . 
C12 C 0.6510(19) 0.1158(16) 0.1422(9) 0.091(8) Uani 1 1 d . . . 
H12 H 0.6237 0.1599 0.1749 0.109 Uiso 1 1 calc R . . 
C13 C 0.6512(16) 0.1493(13) 0.0767(7) 0.066(6) Uani 1 1 d . . . 
C14 C 0.6875(16) 0.0830(14) 0.0276(8) 0.067(5) Uani 1 1 d . . . 
H14 H 0.6873 0.1033 -0.0170 0.080 Uiso 1 1 calc R . . 
C15 C 0.724(2) -0.0154(15) 0.0499(9) 0.099(9) Uani 1 1 d . . . 
H15 H 0.7454 -0.0628 0.0187 0.119 Uiso 1 1 calc R . . 
C16 C 0.5091(17) 0.3084(15) 0.0836(7) 0.068(6) Uani 1 1 d . . . 
H16 H 0.4678 0.2807 0.1164 0.082 Uiso 1 1 calc R . . 
C17 C 0.4695(15) 0.4039(12) 0.0618(8) 0.056(4) Uani 1 1 d . . . 
H17 H 0.4008 0.4416 0.0809 0.067 Uiso 1 1 calc R . . 
C18 C 0.5264(14) 0.4480(12) 0.0127(7) 0.050(4) Uani 1 1 d . . . 
C19 C 0.6309(13) 0.3902(13) -0.0129(7) 0.052(4) Uani 1 1 d . . . 
H19 H 0.6740 0.4169 -0.0453 0.063 Uiso 1 1 calc R . . 
C20 C 0.6702(14) 0.2920(13) 0.0105(8) 0.054(4) Uani 1 1 d . . . 
H20 H 0.7399 0.2533 -0.0068 0.065 Uiso 1 1 calc R . . 
C21 C 0.2309(15) 0.4251(11) 0.6370(8) 0.051(4) Uani 1 1 d . . . 
C22 C 0.2002(15) 0.5175(12) 0.6617(8) 0.050(4) Uani 1 1 d . . . 
H22 H 0.1703 0.5260 0.7044 0.060 Uiso 1 1 calc R . . 
C23 C 0.2154(14) 0.6002(10) 0.6201(7) 0.045(3) Uani 1 1 d . . . 
H23 H 0.1915 0.6633 0.6357 0.054 Uiso 1 1 calc R . . 
C24 C 0.2625(15) 0.5900(10) 0.5597(8) 0.050(4) Uani 1 1 d . . . 
H24 H 0.2718 0.6456 0.5345 0.060 Uiso 1 1 calc R . . 
C25 C 0.2992(15) 0.4940(10) 0.5332(7) 0.049(4) Uani 1 1 d . . . 
C26 C 0.2793(15) 0.4104(11) 0.5718(8) 0.050(4) Uani 1 1 d . . . 
C27 C 0.3133(16) 0.3151(11) 0.5468(8) 0.053(4) Uani 1 1 d . . . 
H27 H 0.3013 0.2606 0.5725 0.064 Uiso 1 1 calc R . . 
C28 C 0.3629(17) 0.3021(11) 0.4860(9) 0.061(5) Uani 1 1 d . . . 
H28 H 0.3831 0.2391 0.4699 0.073 Uiso 1 1 calc R . . 
C29 C 0.3845(17) 0.3849(12) 0.4461(9) 0.060(4) Uani 1 1 d . . . 
H29 H 0.4185 0.3761 0.4043 0.072 Uiso 1 1 calc R . . 
C30 C 0.3543(15) 0.4769(11) 0.4705(8) 0.050(4) Uani 1 1 d . . . 
C31 C 0.4289(16) 0.5504(12) 0.3744(7) 0.053(4) Uani 1 1 d . . . 
H31A H 0.3813 0.5232 0.3450 0.063 Uiso 1 1 calc R . . 
H31B H 0.5073 0.5055 0.3785 0.063 Uiso 1 1 calc R . . 
C32 C 0.4400(15) 0.6495(11) 0.3474(8) 0.050(4) Uani 1 1 d . . . 
H32A H 0.4809 0.6786 0.3794 0.060 Uiso 1 1 calc R . . 
H32B H 0.4884 0.6417 0.3076 0.060 Uiso 1 1 calc R . . 
C33 C 0.2812(15) 0.7788(11) 0.3836(8) 0.050(4) Uani 1 1 d . . . 
H33A H 0.3444 0.8060 0.3999 0.060 Uiso 1 1 calc R . . 
H33B H 0.2536 0.7413 0.4200 0.060 Uiso 1 1 calc R . . 
C34 C 0.1798(15) 0.8613(12) 0.3586(9) 0.057(4) Uani 1 1 d . . . 
H34A H 0.1562 0.9095 0.3918 0.068 Uiso 1 1 calc R . . 
H34B H 0.2042 0.8944 0.3192 0.068 Uiso 1 1 calc R . . 
C35 C -0.0215(18) 0.8958(12) 0.3237(9) 0.066(5) Uani 1 1 d . . . 
H35A H -0.0036 0.9307 0.2834 0.079 Uiso 1 1 calc R . . 
H35B H -0.0426 0.9429 0.3577 0.079 Uiso 1 1 calc R . . 
C36 C -0.1222(16) 0.8491(11) 0.3126(8) 0.054(4) Uani 1 1 d . . . 
H36A H -0.1336 0.8076 0.3511 0.065 Uiso 1 1 calc R . . 
H36B H -0.1955 0.8999 0.3050 0.065 Uiso 1 1 calc R . . 
C37 C -0.1932(15) 0.7565(11) 0.2326(8) 0.050(4) Uani 1 1 d . . . 
H37A H -0.1893 0.7572 0.1848 0.060 Uiso 1 1 calc R . . 
H37B H -0.2675 0.8016 0.2447 0.060 Uiso 1 1 calc R . . 
C38 C 0.1938(17) 0.3446(12) 0.7407(7) 0.055(4) Uani 1 1 d . . . 
H38A H 0.1161 0.3889 0.7471 0.066 Uiso 1 1 calc R . . 
H38B H 0.2530 0.3693 0.7635 0.066 Uiso 1 1 calc R . . 
C39 C 1.016(2) 0.842(2) 0.5116(14) 0.122(10) Uani 1 1 d D . . 
H39A H 1.0025 0.9108 0.4973 0.183 Uiso 1 1 calc R . . 
H39B H 1.0824 0.8045 0.4876 0.183 Uiso 1 1 calc R . . 
H39C H 1.0338 0.8341 0.5580 0.183 Uiso 1 1 calc R . . 
O10 O 0.847(2) 0.3433(16) 0.1713(12) 0.059(6) Uiso 0.50 1 d PD E 5 
O11 O 0.976(5) 0.109(4) 0.069(2) 0.23(3) Uiso 0.50 1 d PD E 5 
O12 O 0.5656(16) 0.7321(12) 0.0466(9) 0.042(4) Uiso 0.50 1 d PD E 5 
O13 O 0.3825(14) 0.8396(13) 0.1245(9) 0.036(4) Uiso 0.50 1 d PD E 5 
O14 O 0.087(5) 0.824(4) 0.1121(14) 0.163(19) Uiso 0.50 1 d PD E 5 
C100 C 0.7459(19) 0.4212(17) 0.1676(13) 0.042(6) Uiso 0.50 1 d PD E 5 
C101 C 0.642(2) 0.427(2) 0.2031(14) 0.038(6) Uiso 0.50 1 d PD E 5 
H101 H 0.6348 0.3768 0.2339 0.046 Uiso 0.50 1 calc PR E 5 
C102 C 0.548(3) 0.5088(18) 0.1926(14) 0.050(7) Uiso 0.50 1 d PD E 5 
H102 H 0.4809 0.5135 0.2194 0.060 Uiso 0.50 1 calc PR E 5 
C103 C 0.547(2) 0.584(2) 0.1452(13) 0.047(7) Uiso 0.50 1 d PD E 5 
H103 H 0.4789 0.6343 0.1372 0.057 Uiso 0.50 1 calc PR E 5 
C104 C 0.652(2) 0.5811(18) 0.1096(12) 0.037(6) Uiso 0.50 1 d PD E 5 
C105 C 0.746(3) 0.500(2) 0.1222(16) 0.045(8) Uiso 0.50 1 d PD E 5 
C106 C 0.849(3) 0.493(3) 0.0848(18) 0.068(11) Uiso 0.50 1 d PD E 5 
H106 H 0.9155 0.4405 0.0933 0.082 Uiso 0.50 1 calc PR E 5 
C107 C 0.854(3) 0.564(2) 0.0350(17) 0.058(8) Uiso 0.50 1 d PD E 5 
H107 H 0.9195 0.5538 0.0066 0.069 Uiso 0.50 1 calc PR E 5 
C108 C 0.766(2) 0.649(2) 0.0258(15) 0.044(7) Uiso 0.50 1 d PD E 5 
H108 H 0.7753 0.7009 -0.0036 0.052 Uiso 0.50 1 calc PR E 5 
C109 C 0.663(2) 0.6549(17) 0.0618(13) 0.039(7) Uiso 0.50 1 d PD E 5 
C110 C 0.870(14) 0.239(3) 0.163(3) 0.36(9) Uiso 0.50 1 d PDU E 5 
H11A H 0.8029 0.2195 0.1845 0.435 Uiso 0.50 1 calc PR E 5 
H11B H 0.9384 0.2111 0.1914 0.435 Uiso 0.50 1 calc PR E 5 
C111 C 0.894(3) 0.180(2) 0.1027(15) 0.046(7) Uiso 0.50 1 d PDU E 5 
H11C H 0.8249 0.1516 0.1040 0.055 Uiso 0.50 1 calc PR E 5 
H11D H 0.8751 0.2331 0.0684 0.055 Uiso 0.50 1 calc PR E 5 
C112 C 0.567(2) 0.8226(16) 0.0730(11) 0.035(6) Uiso 0.50 1 d PD E 5 
H11E H 0.5303 0.8768 0.0422 0.042 Uiso 0.50 1 calc PR E 5 
H11F H 0.6492 0.8259 0.0797 0.042 Uiso 0.50 1 calc PR E 5 
C113 C 0.5012(18) 0.832(2) 0.1373(12) 0.042(7) Uiso 0.50 1 d PD E 5 
H11G H 0.5325 0.7749 0.1669 0.050 Uiso 0.50 1 calc PR E 5 
H11H H 0.5106 0.8909 0.1580 0.050 Uiso 0.50 1 calc PR E 5 
C114 C 0.2859(15) 0.7991(14) 0.1305(10) 0.019(4) Uiso 0.50 1 d PD E 5 
H11I H 0.3114 0.7381 0.1577 0.022 Uiso 0.50 1 calc PR E 5 
H11J H 0.2712 0.7800 0.0868 0.022 Uiso 0.50 1 calc PR E 5 
C115 C 0.169(2) 0.850(2) 0.1565(15) 0.046(7) Uiso 0.50 1 d PD E 5 
H11K H 0.1571 0.8267 0.2016 0.055 Uiso 0.50 1 calc PR E 5 
H11L H 0.1599 0.9213 0.1550 0.055 Uiso 0.50 1 calc PR E 5 
C116 C 0.994(3) 0.149(4) 0.0055(18) 0.087(13) Uiso 0.50 1 d PD . 5 
H11M H 1.0722 0.1150 -0.0100 0.105 Uiso 0.50 1 calc PR . 5 
H11N H 0.9962 0.2181 0.0095 0.105 Uiso 0.50 1 calc PR . 5 
C117 C 0.0945(19) 0.8535(17) 0.0452(10) 0.025(5) Uiso 0.50 1 d PD . 5 
H11O H 0.1703 0.8147 0.0295 0.030 Uiso 0.50 1 calc PR . 5 
H11P H 0.1016 0.9215 0.0441 0.030 Uiso 0.50 1 calc PR . 5 
O20 O 0.936(2) 0.3350(17) 0.1036(12) 0.071(7) Uiso 0.50 1 d PD F 6 
O21 O 0.960(2) 0.2434(18) -0.0137(10) 0.066(6) Uiso 0.50 1 d PD F 6 
O22 O 0.5283(17) 0.6833(14) 0.1475(10) 0.048(5) Uiso 0.50 1 d PD F 6 
O23 O 0.350(2) 0.815(3) 0.1906(15) 0.110(10) Uiso 0.50 1 d PD F 6 
O24 O 0.1463(16) 0.8199(14) 0.1272(11) 0.043(5) Uiso 0.50 1 d PD F 6 
C200 C 0.830(3) 0.3875(18) 0.1334(15) 0.061(9) Uiso 0.50 1 d PD F 6 
C201 C 0.789(2) 0.339(2) 0.1878(13) 0.045(7) Uiso 0.50 1 d PD F 6 
H201 H 0.8286 0.2772 0.2052 0.054 Uiso 0.50 1 calc PR F 6 
C202 C 0.683(2) 0.3938(18) 0.2133(14) 0.042(7) Uiso 0.50 1 d PD F 6 
H202 H 0.6460 0.3644 0.2473 0.050 Uiso 0.50 1 calc PR F 6 
C203 C 0.629(2) 0.4899(17) 0.1906(12) 0.035(6) Uiso 0.50 1 d PD F 6 
H203 H 0.5595 0.5229 0.2111 0.042 Uiso 0.50 1 calc PR F 6 
C204 C 0.676(2) 0.5390(17) 0.1382(12) 0.040(6) Uiso 0.50 1 d PD F 6 
C205 C 0.782(2) 0.4851(16) 0.1108(13) 0.030(6) Uiso 0.50 1 d PD F 6 
C206 C 0.848(3) 0.523(3) 0.0629(17) 0.055(9) Uiso 0.50 1 d PD F 6 
H206 H 0.9217 0.4856 0.0502 0.067 Uiso 0.50 1 calc PR F 6 
C207 C 0.804(4) 0.616(3) 0.034(2) 0.085(14) Uiso 0.50 1 d PD F 6 
H207 H 0.8378 0.6421 -0.0029 0.102 Uiso 0.50 1 calc PR F 6 
C208 C 0.705(3) 0.667(3) 0.066(2) 0.096(16) Uiso 0.50 1 d PD F 6 
H208 H 0.6805 0.7337 0.0519 0.115 Uiso 0.50 1 calc PR F 6 
C209 C 0.633(2) 0.6368(19) 0.1146(14) 0.050(8) Uiso 0.50 1 d PD F 6 
C210 C 0.960(3) 0.2308(19) 0.1021(15) 0.064(9) Uiso 0.50 1 d PD F 6 
H21A H 0.8853 0.2101 0.1028 0.077 Uiso 0.50 1 calc PR F 6 
H21B H 1.0055 0.2004 0.1409 0.077 Uiso 0.50 1 calc PR F 6 
C211 C 1.028(2) 0.198(2) 0.0420(11) 0.045(7) Uiso 0.50 1 d PD F 6 
H21C H 1.1041 0.2166 0.0417 0.054 Uiso 0.50 1 calc PR F 6 
H21D H 1.0441 0.1265 0.0409 0.054 Uiso 0.50 1 calc PR F 6 
C212 C 0.517(3) 0.784(2) 0.126(2) 0.097(15) Uiso 0.50 1 d PDU F 6 
H21E H 0.4596 0.8019 0.0905 0.116 Uiso 0.50 1 calc PR F 6 
H21F H 0.5937 0.7922 0.1089 0.116 Uiso 0.50 1 calc PR F 6 
C213 C 0.479(4) 0.850(3) 0.180(4) 0.42(11) Uiso 0.50 1 d PDU F 6 
H21G H 0.4681 0.9194 0.1657 0.502 Uiso 0.50 1 calc PR F 6 
H21H H 0.5312 0.8333 0.2179 0.502 Uiso 0.50 1 calc PR F 6 
C214 C 0.297(3) 0.878(3) 0.175(3) 0.12(2) Uiso 0.50 1 d PDU F 6 
H21I H 0.3422 0.9016 0.1398 0.147 Uiso 0.50 1 calc PR F 6 
H21J H 0.2986 0.9204 0.2112 0.147 Uiso 0.50 1 calc PR F 6 
C215 C 0.169(3) 0.911(2) 0.151(3) 0.099(17) Uiso 0.50 1 d PDU F 6 
H21K H 0.1143 0.9349 0.1867 0.119 Uiso 0.50 1 calc PR F 6 
H21L H 0.1605 0.9620 0.1158 0.119 Uiso 0.50 1 calc PR F 6 
C216 C 1.010(3) 0.2358(19) -0.0759(11) 0.046(7) Uiso 0.50 1 d PD . 6 
H21M H 1.0960 0.2227 -0.0726 0.055 Uiso 0.50 1 calc PR . 6 
H21N H 0.9819 0.2981 -0.1014 0.055 Uiso 0.50 1 calc PR . 6 
C217 C 0.022(2) 0.8436(18) 0.1101(14) 0.044(7) Uiso 0.50 1 d PD . 6 
H21O H 0.0043 0.9040 0.0818 0.053 Uiso 0.50 1 calc PR . 6 
H21P H -0.0255 0.8554 0.1499 0.053 Uiso 0.50 1 calc PR . 6 
 
loop_ 
 _atom_site_aniso_label 
 _atom_site_aniso_U_11 
 _atom_site_aniso_U_22 
 _atom_site_aniso_U_33 
 _atom_site_aniso_U_23 
 _atom_site_aniso_U_13 
 _atom_site_aniso_U_12 
I1 0.0603(7) 0.0508(6) 0.0540(6) -0.0147(5) 0.0111(5) -0.0246(5) 
I2 0.0479(6) 0.0587(6) 0.0482(6) 0.0083(5) -0.0026(4) -0.0158(5) 
I3A 0.0437(18) 0.0393(14) 0.0614(19) -0.0038(15) 0.0128(15) -0.0129(12) 
I4A 0.0310(12) 0.0415(11) 0.0382(12) 0.0035(9) -0.0015(10) -0.0091(11) 
I3B 0.0437(15) 0.0338(13) 0.127(4) 0.002(2) -0.001(3) -0.0157(11) 
I4B 0.123(4) 0.068(2) 0.070(3) 0.0060(19) -0.042(3) -0.049(3) 
Cd1 0.0446(6) 0.0377(6) 0.0619(7) -0.0095(5) -0.0014(5) -0.0116(5) 
Cl1 0.103(9) 0.089(8) 0.129(11) -0.001(8) 0.008(8) -0.022(7) 
Cl2 0.127(12) 0.118(11) 0.130(13) -0.021(10) 0.033(10) -0.011(10) 
Cl3 0.113(11) 0.129(13) 0.161(15) -0.074(12) -0.009(10) -0.003(10) 
C40 0.07(3) 0.12(4) 0.22(8) -0.11(5) 0.03(4) -0.04(3) 
O500 0.13(3) 0.09(2) 0.12(3) 0.00(2) 0.02(2) -0.03(2) 
C500 0.19(6) 0.21(6) 0.13(5) 0.03(5) -0.03(5) -0.08(5) 
O600 0.22(6) 0.27(6) 0.22(6) -0.09(6) -0.01(5) -0.15(5) 
C600 0.29(8) 0.26(7) 0.18(7) -0.17(6) 0.08(6) -0.16(7) 
O1 0.076(8) 0.038(5) 0.044(6) 0.004(5) -0.016(5) -0.016(5) 
O2 0.086(8) 0.035(5) 0.043(6) 0.005(5) -0.008(6) -0.012(5) 
O3 0.071(7) 0.037(5) 0.041(6) 0.004(4) -0.020(5) -0.019(5) 
O4 0.062(7) 0.033(5) 0.068(7) 0.008(5) -0.017(6) -0.025(5) 
O5 0.072(8) 0.045(6) 0.055(7) 0.014(5) -0.010(6) -0.022(6) 
O6 0.26(3) 0.080(12) 0.136(18) -0.014(13) 0.022(19) -0.060(16) 
N1 0.057(8) 0.039(6) 0.044(7) 0.004(5) -0.003(6) -0.017(6) 
N2 0.055(7) 0.020(5) 0.034(6) -0.005(4) -0.005(5) -0.010(5) 
N3 0.137(18) 0.102(14) 0.052(10) 0.011(10) 0.010(11) 0.060(13) 
N4 0.061(8) 0.068(9) 0.022(6) -0.004(6) 0.008(6) 0.010(7) 
C1 0.049(9) 0.050(9) 0.055(10) -0.037(8) 0.007(7) -0.011(7) 
C2 0.043(8) 0.037(7) 0.030(7) -0.011(6) -0.001(6) -0.011(6) 
C3 0.044(8) 0.032(7) 0.038(7) -0.003(6) -0.008(6) -0.013(6) 
C4 0.075(11) 0.035(7) 0.041(8) -0.001(6) -0.004(8) -0.026(7) 
C5 0.078(11) 0.033(7) 0.042(9) -0.006(6) 0.000(8) -0.024(7) 
C6 0.049(8) 0.031(7) 0.039(8) -0.005(6) -0.009(6) -0.018(6) 
C7 0.054(9) 0.035(7) 0.038(8) -0.001(6) -0.009(7) -0.020(7) 
C8 0.064(9) 0.020(6) 0.036(7) 0.000(5) -0.014(7) -0.018(6) 
C9 0.106(14) 0.025(7) 0.031(8) -0.006(6) 0.000(8) -0.019(8) 
C10 0.073(11) 0.032(7) 0.032(7) 0.000(6) -0.012(7) -0.019(7) 
C11 0.093(16) 0.12(2) 0.051(12) 0.025(12) 0.033(11) 0.046(14) 
C12 0.094(15) 0.093(15) 0.045(10) 0.009(10) 0.022(10) 0.053(12) 
C13 0.073(12) 0.071(11) 0.026(8) 0.009(7) 0.021(7) 0.034(9) 
C14 0.061(11) 0.075(12) 0.040(9) 0.007(8) 0.003(8) 0.028(9) 
C15 0.124(19) 0.076(13) 0.051(11) 0.012(10) 0.039(12) 0.060(13) 
C16 0.073(12) 0.086(13) 0.024(8) -0.013(8) 0.012(8) 0.022(10) 
C17 0.056(10) 0.059(10) 0.038(9) -0.014(7) 0.012(7) 0.017(8) 
C18 0.050(9) 0.064(10) 0.028(7) -0.013(7) -0.007(7) 0.001(8) 
C19 0.040(8) 0.078(11) 0.026(7) -0.014(7) -0.008(6) 0.013(8) 
C20 0.041(9) 0.073(11) 0.040(9) -0.011(8) -0.011(7) 0.004(8) 
C21 0.062(10) 0.045(8) 0.048(9) 0.015(7) -0.025(8) -0.017(8) 
C22 0.059(10) 0.054(9) 0.039(8) 0.000(7) -0.014(7) -0.015(8) 
C23 0.059(9) 0.032(7) 0.044(9) -0.005(6) -0.006(7) -0.010(7) 
C24 0.071(11) 0.024(7) 0.054(10) 0.003(6) -0.015(8) -0.009(7) 
C25 0.070(11) 0.031(7) 0.045(9) 0.000(6) -0.023(8) -0.007(7) 
C26 0.061(10) 0.045(8) 0.047(9) -0.004(7) -0.014(8) -0.016(7) 
C27 0.078(12) 0.032(7) 0.053(10) -0.003(7) -0.021(9) -0.019(8) 
C28 0.087(13) 0.026(7) 0.069(12) -0.006(7) -0.021(10) -0.010(8) 
C29 0.076(12) 0.053(10) 0.050(10) -0.008(8) -0.009(9) -0.012(9) 
C30 0.064(10) 0.037(8) 0.047(9) 0.001(7) -0.031(8) -0.009(7) 
C31 0.073(11) 0.052(9) 0.032(8) -0.004(7) -0.013(8) -0.011(8) 
C32 0.066(10) 0.052(9) 0.039(8) -0.002(7) -0.002(7) -0.029(8) 
C33 0.066(10) 0.043(8) 0.049(9) 0.003(7) -0.018(8) -0.029(8) 
C34 0.069(11) 0.049(9) 0.060(10) -0.005(8) -0.002(9) -0.029(8) 
C35 0.096(14) 0.038(8) 0.066(11) 0.013(8) -0.024(10) -0.023(9) 
C36 0.069(11) 0.039(8) 0.057(10) 0.003(7) -0.027(8) -0.019(8) 
C37 0.064(10) 0.049(9) 0.044(8) 0.007(7) -0.024(8) -0.026(8) 
C38 0.081(12) 0.050(9) 0.035(8) -0.001(7) -0.012(8) -0.018(8) 
C39 0.10(2) 0.16(3) 0.10(2) -0.01(2) -0.015(17) -0.02(2) 
 
_geom_special_details 
; 
 All esds (except the esd in the dihedral angle between two l.s. planes) 
 are estimated using the full covariance matrix.  The cell esds are taken 
 into account individually in the estimation of esds in distances, angles 
 and torsion angles; correlations between esds in cell parameters are only 
 used when they are defined by crystal symmetry.  An approximate (isotropic) 
 treatment of cell esds is used for estimating esds involving l.s. planes. 
; 
 
loop_ 
 _geom_bond_atom_site_label_1 
 _geom_bond_atom_site_label_2 
 _geom_bond_distance 
 _geom_bond_site_symmetry_2 
 _geom_bond_publ_flag 
I1 Cd1 2.7482(15) . ? 
I2 Cd1 2.7704(15) . ? 
I3A Cd1 2.757(5) . ? 
I4A Cd1 2.877(4) . ? 
I3B Cd1 2.827(5) . ? 
I4B Cd1 2.679(5) . ? 
Cl1 C40 1.76(2) . ? 
Cl2 C40 1.77(2) . ? 
Cl3 C40 1.76(2) . ? 
O500 C500 1.43(2) . ? 
O600 C600 1.46(2) . ? 
O1 C21 1.371(17) . ? 
O1 C38 1.422(18) . ? 
O2 C30 1.389(18) . ? 
O2 C31 1.412(19) . ? 
O3 C33 1.413(19) . ? 
O3 C32 1.438(19) . ? 
O4 C35 1.43(2) . ? 
O4 C34 1.451(18) . ? 
O5 C36 1.426(19) . ? 
O5 C37 1.431(17) . ? 
O6 C39 1.441(18) . ? 
N1 C1 1.304(19) . ? 
N1 C5 1.346(18) . ? 
N2 C10 1.322(17) . ? 
N2 C6 1.360(16) . ? 
N2 C3 1.447(17) . ? 
N3 C11 1.31(3) . ? 
N3 C15 1.34(2) . ? 
N4 C20 1.31(2) . ? 
N4 C16 1.37(2) . ? 
N4 C13 1.44(2) . ? 
C1 C2 1.41(2) . ? 
C2 C3 1.376(18) . ? 
C3 C4 1.378(19) . ? 
C4 C5 1.36(2) . ? 
C6 C7 1.348(19) . ? 
C7 C8 1.419(19) . ? 
C8 C9 1.393(18) . ? 
C8 C8 1.49(3) 2_766 ? 
C9 C10 1.35(2) . ? 
C11 C12 1.34(3) . ? 
C12 C13 1.38(2) . ? 
C13 C14 1.39(2) . ? 
C14 C15 1.38(3) . ? 
C16 C17 1.35(2) . ? 
C17 C18 1.38(2) . ? 
C18 C19 1.39(2) . ? 
C18 C18 1.49(3) 2_665 ? 
C19 C20 1.39(2) . ? 
C21 C22 1.37(2) . ? 
C21 C26 1.43(2) . ? 
C22 C23 1.43(2) . ? 
C23 C24 1.33(2) . ? 
C24 C25 1.44(2) . ? 
C25 C30 1.42(2) . ? 
C25 C26 1.42(2) . ? 
C26 C27 1.41(2) . ? 
C27 C28 1.36(2) . ? 
C28 C29 1.44(2) . ? 
C29 C30 1.37(2) . ? 
C31 C32 1.49(2) . ? 
C33 C34 1.50(2) . ? 
C35 C36 1.49(2) . ? 
C37 C38 1.48(2) 2_566 ? 
C38 C37 1.48(2) 2_566 ? 
O10 C100 1.389(18) . ? 
O10 C110 1.43(2) . ? 
O11 C111 1.40(2) . ? 
O11 C116 1.41(2) . ? 
O12 C109 1.380(18) . ? 
O12 C112 1.404(18) . ? 
O13 C114 1.364(17) . ? 
O13 C113 1.376(18) . ? 
O14 C117 1.40(2) . ? 
O14 C115 1.44(2) . ? 
C100 C101 1.375(19) . ? 
C100 C105 1.389(19) . ? 
C101 C102 1.38(2) . ? 
C102 C103 1.374(19) . ? 
C103 C104 1.395(19) . ? 
C104 C105 1.37(2) . ? 
C104 C109 1.394(19) . ? 
C105 C106 1.39(2) . ? 
C106 C107 1.38(2) . ? 
C107 C108 1.37(2) . ? 
C108 C109 1.370(19) . ? 
C110 C111 1.50(2) . ? 
C112 C113 1.495(19) . ? 
C114 C115 1.473(19) . ? 
C116 C117 1.473(15) 2_665 ? 
C117 C116 1.473(15) 2_665 ? 
O20 C200 1.409(19) . ? 
O20 C210 1.413(19) . ? 
O21 C216 1.375(19) . ? 
O21 C211 1.415(19) . ? 
O22 C209 1.404(19) . ? 
O22 C212 1.42(2) . ? 
O23 C214 0.97(2) . ? 
O23 C213 1.687(16) . ? 
O24 C217 1.430(19) . ? 
O24 C215 1.462(19) . ? 
C200 C201 1.39(2) . ? 
C200 C205 1.393(19) . ? 
C201 C202 1.38(2) . ? 
C202 C203 1.388(19) . ? 
C203 C204 1.398(19) . ? 
C204 C209 1.391(19) . ? 
C204 C205 1.394(19) . ? 
C205 C206 1.38(2) . ? 
C206 C207 1.38(2) . ? 
C207 C208 1.36(2) . ? 
C208 C209 1.39(2) . ? 
C210 C211 1.48(2) . ? 
C212 C213 1.46(2) . ? 
C214 C215 1.520(19) . ? 
C216 C217 1.462(14) 2_665 ? 
C217 C216 1.462(14) 2_665 ? 
 
loop_ 
 _geom_angle_atom_site_label_1 
 _geom_angle_atom_site_label_2 
 _geom_angle_atom_site_label_3 
 _geom_angle 
 _geom_angle_site_symmetry_1 
 _geom_angle_site_symmetry_3 
 _geom_angle_publ_flag 
I4B Cd1 I1 106.52(11) . . ? 
I4B Cd1 I3A 96.21(13) . . ? 
I1 Cd1 I3A 111.39(10) . . ? 
I4B Cd1 I2 116.67(12) . . ? 
I1 Cd1 I2 108.48(5) . . ? 
I3A Cd1 I2 116.81(9) . . ? 
I4B Cd1 I3B 109.33(14) . . ? 
I1 Cd1 I3B 107.95(10) . . ? 
I3A Cd1 I3B 13.24(9) . . ? 
I2 Cd1 I3B 107.60(9) . . ? 
I4B Cd1 I4A 12.02(11) . . ? 
I1 Cd1 I4A 101.54(9) . . ? 
I3A Cd1 I4A 108.23(9) . . ? 
I2 Cd1 I4A 109.28(8) . . ? 
I3B Cd1 I4A 121.33(11) . . ? 
Cl3 C40 Cl1 107.6(17) . . ? 
Cl3 C40 Cl2 113.1(18) . . ? 
Cl1 C40 Cl2 112.6(17) . . ? 
C21 O1 C38 118.7(12) . . ? 
C30 O2 C31 117.1(12) . . ? 
C33 O3 C32 113.2(11) . . ? 
C35 O4 C34 110.3(11) . . ? 
C36 O5 C37 114.5(13) . . ? 
C1 N1 C5 115.1(13) . . ? 
C10 N2 C6 119.8(12) . . ? 
C10 N2 C3 120.3(11) . . ? 
C6 N2 C3 119.9(11) . . ? 
C11 N3 C15 118.9(18) . . ? 
C20 N4 C16 120.4(15) . . ? 
C20 N4 C13 119.9(13) . . ? 
C16 N4 C13 119.7(15) . . ? 
N1 C1 C2 125.5(13) . . ? 
C3 C2 C1 116.5(13) . . ? 
C2 C3 C4 119.7(13) . . ? 
C2 C3 N2 120.0(12) . . ? 
C4 C3 N2 120.3(12) . . ? 
C5 C4 C3 117.7(13) . . ? 
N1 C5 C4 125.4(14) . . ? 
C7 C6 N2 121.1(13) . . ? 
C6 C7 C8 119.7(12) . . ? 
C9 C8 C7 117.0(13) . . ? 
C9 C8 C8 123.5(15) . 2_766 ? 
C7 C8 C8 119.4(13) . 2_766 ? 
C10 C9 C8 119.9(13) . . ? 
N2 C10 C9 122.3(13) . . ? 
N3 C11 C12 122.7(18) . . ? 
C11 C12 C13 118.9(19) . . ? 
C12 C13 C14 120.6(17) . . ? 
C12 C13 N4 121.8(15) . . ? 
C14 C13 N4 117.6(13) . . ? 
C15 C14 C13 115.0(15) . . ? 
N3 C15 C14 123.6(19) . . ? 
C17 C16 N4 119.1(17) . . ? 
C16 C17 C18 122.7(15) . . ? 
C17 C18 C19 116.9(15) . . ? 
C17 C18 C18 120.4(17) . 2_665 ? 
C19 C18 C18 122.7(19) . 2_665 ? 
C18 C19 C20 119.3(16) . . ? 
N4 C20 C19 121.6(15) . . ? 
C22 C21 O1 123.8(15) . . ? 
C22 C21 C26 121.6(14) . . ? 
O1 C21 C26 114.6(14) . . ? 
C21 C22 C23 118.3(15) . . ? 
C24 C23 C22 122.3(14) . . ? 
C23 C24 C25 120.8(14) . . ? 
C30 C25 C26 117.5(13) . . ? 
C30 C25 C24 124.0(14) . . ? 
C26 C25 C24 118.5(15) . . ? 
C27 C26 C25 119.9(15) . . ? 
C27 C26 C21 121.6(14) . . ? 
C25 C26 C21 118.4(14) . . ? 
C28 C27 C26 120.8(15) . . ? 
C27 C28 C29 120.5(15) . . ? 
C30 C29 C28 119.0(16) . . ? 
C29 C30 O2 123.9(16) . . ? 
C29 C30 C25 122.3(15) . . ? 
O2 C30 C25 113.8(13) . . ? 
O2 C31 C32 108.2(13) . . ? 
O3 C32 C31 112.5(13) . . ? 
O3 C33 C34 110.1(12) . . ? 
O4 C34 C33 108.1(12) . . ? 
O4 C35 C36 108.1(12) . . ? 
O5 C36 C35 108.7(15) . . ? 
O5 C37 C38 112.8(12) . 2_566 ? 
O1 C38 C37 108.0(13) . 2_566 ? 
C100 O10 C110 135(7) . . ? 
C111 O11 C116 108(4) . . ? 
C109 O12 C112 116(2) . . ? 
C114 O13 C113 149(2) . . ? 
C117 O14 C115 117(3) . . ? 
C101 C100 O10 126(2) . . ? 
C101 C100 C105 115(2) . . ? 
O10 C100 C105 118(2) . . ? 
C102 C101 C100 119(3) . . ? 
C103 C102 C101 124(3) . . ? 
C102 C103 C104 117(3) . . ? 
C105 C104 C109 121(2) . . ? 
C105 C104 C103 117(2) . . ? 
C109 C104 C103 122(2) . . ? 
C104 C105 C100 127(3) . . ? 
C104 C105 C106 118(2) . . ? 
C100 C105 C106 116(3) . . ? 
C107 C106 C105 120(3) . . ? 
C108 C107 C106 123(3) . . ? 
C109 C108 C107 117(3) . . ? 
C108 C109 O12 118(2) . . ? 
C108 C109 C104 122(2) . . ? 
O12 C109 C104 120(2) . . ? 
O10 C110 C111 132(4) . . ? 
O11 C111 C110 146(7) . . ? 
O12 C112 C113 110(2) . . ? 
O13 C113 C112 108(2) . . ? 
O13 C114 C115 124(2) . . ? 
O14 C115 C114 102(3) . . ? 
O11 C116 C117 117(4) . 2_665 ? 
O14 C117 C116 125(3) . 2_665 ? 
C200 O20 C210 120(2) . . ? 
C216 O21 C211 120(2) . . ? 
C209 O22 C212 101(2) . . ? 
C214 O23 C213 97(4) . . ? 
C217 O24 C215 105.6(15) . . ? 
C201 C200 C205 125(2) . . ? 
C201 C200 O20 116(2) . . ? 
C205 C200 O20 119(2) . . ? 
C202 C201 C200 113(2) . . ? 
C201 C202 C203 123(3) . . ? 
C202 C203 C204 123(2) . . ? 
C209 C204 C205 117.7(19) . . ? 
C209 C204 C203 127(2) . . ? 
C205 C204 C203 115(2) . . ? 
C206 C205 C200 115(3) . . ? 
C206 C205 C204 124(2) . . ? 
C200 C205 C204 120(2) . . ? 
C207 C206 C205 120(3) . . ? 
C208 C207 C206 112(4) . . ? 
C207 C208 C209 131(4) . . ? 
C208 C209 C204 113(2) . . ? 
C208 C209 O22 135(2) . . ? 
C204 C209 O22 112(2) . . ? 
O20 C210 C211 110(2) . . ? 
O21 C211 C210 109(2) . . ? 
O22 C212 C213 112(2) . . ? 
C212 C213 O23 92.7(14) . . ? 
O23 C214 C215 135(3) . . ? 
O24 C215 C214 103.0(16) . . ? 
O21 C216 C217 111(2) . 2_665 ? 
O24 C217 C216 112(2) . 2_665 ? 
 
_diffrn_measured_fraction_theta_max    0.997 
_diffrn_reflns_theta_full              27.88 
_diffrn_measured_fraction_theta_full   0.997 
_refine_diff_density_max    1.929 
_refine_diff_density_min   -2.079 
_refine_diff_density_rms    0.201 

#===END
 
data_2(Hg2Cl6)2+PyBP+2CH3OH 
 
_audit_creation_method            SHELXL-97 
_chemical_name_systematic 
; 
 ? 
; 
_chemical_name_common             ? 
_chemical_melting_point           ? 
_chemical_formula_moiety          ? 
_chemical_formula_sum 
 'C78 H84 Cl12 Hg4 N8 O12' 
_chemical_formula_weight          2553.29 
 
loop_ 
 _atom_type_symbol 
 _atom_type_description 
 _atom_type_scat_dispersion_real 
 _atom_type_scat_dispersion_imag 
 _atom_type_scat_source 
 'C'  'C'   0.0033   0.0016 
 'International Tables Vol C Tables 4.2.6.8 and 6.1.1.4' 
 'H'  'H'   0.0000   0.0000 
 'International Tables Vol C Tables 4.2.6.8 and 6.1.1.4' 
 'Cl'  'Cl'   0.1484   0.1585 
 'International Tables Vol C Tables 4.2.6.8 and 6.1.1.4' 
 'Hg'  'Hg'  -2.3894   9.2266 
 'International Tables Vol C Tables 4.2.6.8 and 6.1.1.4' 
 'N'  'N'   0.0061   0.0033 
 'International Tables Vol C Tables 4.2.6.8 and 6.1.1.4' 
 'O'  'O'   0.0106   0.0060 
 'International Tables Vol C Tables 4.2.6.8 and 6.1.1.4' 
 
_symmetry_cell_setting           'Triclinic'
_symmetry_space_group_name_H-M   'P-1   '
 
loop_ 
 _symmetry_equiv_pos_as_xyz 
 'x, y, z' 
 '-x, -y, -z' 
 
_cell_length_a                    10.88690(10) 
_cell_length_b                    14.78220(10) 
_cell_length_c                    15.32430(10) 
_cell_angle_alpha                 112.3730(10) 
_cell_angle_beta                  100.9170(10) 
_cell_angle_gamma                 103.5720(10) 
_cell_volume                      2107.60(3) 
_cell_formula_units_Z             1 
_cell_measurement_temperature     100(2) 
_cell_measurement_reflns_used     8084
_cell_measurement_theta_min       2.63
_cell_measurement_theta_max       23.70 
 
_exptl_crystal_description        'prism'
_exptl_crystal_colour             'purple'
_exptl_crystal_size_max           0.17 
_exptl_crystal_size_mid           0.09 
_exptl_crystal_size_min           0.03 
_exptl_crystal_density_meas       ? 
_exptl_crystal_density_diffrn     2.012 
_exptl_crystal_density_method     'not measured' 
_exptl_crystal_F_000              1228 
_exptl_absorpt_coefficient_mu     7.707 
_exptl_absorpt_correction_type    multi-scan 
_exptl_absorpt_correction_T_min   0.5630 
_exptl_absorpt_correction_T_max   0.7461 
_exptl_absorpt_process_details    ? 
 
_exptl_special_details 
; 
 ? 
; 
 
_diffrn_ambient_temperature       100(2) 
_diffrn_radiation_wavelength      0.71073 
_diffrn_radiation_type            MoK\a 
_diffrn_radiation_source          'fine-focus sealed tube' 
_diffrn_radiation_monochromator   graphite 
_diffrn_measurement_device_type   'Bruker APEX-II CCD'
_diffrn_measurement_method        '\f and \w scans'
_diffrn_detector_area_resol_mean  ? 
_diffrn_reflns_number             57233 
_diffrn_reflns_av_R_equivalents   0.0680 
_diffrn_reflns_av_sigmaI/netI     0.0800 
_diffrn_reflns_limit_h_min        -15 
_diffrn_reflns_limit_h_max        15 
_diffrn_reflns_limit_k_min        -20 
_diffrn_reflns_limit_k_max        20 
_diffrn_reflns_limit_l_min        -21 
_diffrn_reflns_limit_l_max        21 
_diffrn_reflns_theta_min          1.51 
_diffrn_reflns_theta_max          30.03 
_reflns_number_total              12266 
_reflns_number_gt                 7828 
_reflns_threshold_expression      >2sigma(I) 
 
_computing_data_collection      'Bruker APEX2'
_computing_cell_refinement      'Bruker SAINT'
_computing_data_reduction       'Bruker SAINT'
_computing_structure_solution   'SHELXS-97 (Sheldrick, 2008)'
_computing_structure_refinement 'SHELXL-97 (Sheldrick, 2008)'
_computing_molecular_graphics   'Bruker SHELXTL'
_computing_publication_material 'Bruker SHELXTL'
 
_refine_special_details 
; 
 Refinement of F^2^ against ALL reflections.  The weighted R-factor wR and 
 goodness of fit S are based on F^2^, conventional R-factors R are based 
 on F, with F set to zero for negative F^2^. The threshold expression of 
 F^2^ > 2sigma(F^2^) is used only for calculating R-factors(gt) etc. and is 
 not relevant to the choice of reflections for refinement.  R-factors based 
 on F^2^ are statistically about twice as large as those based on F, and R- 
 factors based on ALL data will be even larger. 
; 
 
_refine_ls_structure_factor_coef  Fsqd  
_refine_ls_matrix_type            full 
_refine_ls_weighting_scheme       calc  
_refine_ls_weighting_details 
 'calc w=1/[\s^2^(Fo^2^)+(0.0164P)^2^+4.2906P] where P=(Fo^2^+2Fc^2^)/3' 
_atom_sites_solution_primary      direct 
_atom_sites_solution_secondary    difmap 
_atom_sites_solution_hydrogens    geom 
_refine_ls_hydrogen_treatment     constr 
_refine_ls_extinction_method      none 
_refine_ls_extinction_coef        ? 
_refine_ls_number_reflns          12266 
_refine_ls_number_parameters      508 
_refine_ls_number_restraints      2 
_refine_ls_R_factor_all           0.0910 
_refine_ls_R_factor_gt            0.0432 
_refine_ls_wR_factor_ref          0.0776 
_refine_ls_wR_factor_gt           0.0655 
_refine_ls_goodness_of_fit_ref    1.022 
_refine_ls_restrained_S_all       1.023 
_refine_ls_shift/su_max           0.002 
_refine_ls_shift/su_mean          0.000 
 
loop_ 
 _atom_site_label 
 _atom_site_type_symbol 
 _atom_site_fract_x 
 _atom_site_fract_y 
 _atom_site_fract_z 
 _atom_site_U_iso_or_equiv 
 _atom_site_adp_type 
 _atom_site_occupancy 
 _atom_site_symmetry_multiplicity 
 _atom_site_calc_flag 
 _atom_site_refinement_flags 
 _atom_site_disorder_assembly 
 _atom_site_disorder_group 
Hg1 Hg 0.80748(2) 0.736158(16) 0.734716(15) 0.02970(7) Uani 1 1 d . . . 
Hg2 Hg 0.45713(2) 0.787072(17) 0.602751(16) 0.03321(7) Uani 1 1 d . . . 
Cl1 Cl 0.94641(14) 0.91357(10) 0.79552(10) 0.0344(4) Uani 1 1 d . . . 
Cl2 Cl 0.83519(15) 0.61261(11) 0.79334(11) 0.0353(3) Uani 1 1 d . . . 
Cl3 Cl 0.56657(13) 0.73434(10) 0.74047(9) 0.0254(3) Uani 1 1 d . . . 
Cl4 Cl 0.63385(14) 0.94221(10) 0.63458(10) 0.0304(3) Uani 1 1 d . . . 
Cl5 Cl 0.38146(13) 0.64304(10) 0.43953(9) 0.0255(3) Uani 1 1 d . . . 
Cl6 Cl 0.27387(17) 0.81526(15) 0.67144(12) 0.0545(5) Uani 1 1 d . . . 
O1 O 0.5015(3) 0.8094(3) 0.2391(2) 0.0253(8) Uani 1 1 d . . . 
O2 O 0.7522(3) 0.9324(3) 0.3992(2) 0.0251(8) Uani 1 1 d . . . 
O3 O 0.9519(3) 0.8525(3) 0.3550(3) 0.0251(8) Uani 1 1 d . . . 
O4 O 0.0004(4) 0.3281(3) -0.3224(3) 0.0339(10) Uani 1 1 d . . . 
O5 O 0.1308(3) 0.5253(3) -0.1682(2) 0.0277(9) Uani 1 1 d . . . 
O6A O 0.0329(18) 0.6917(15) 0.6701(14) 0.160(7) Uiso 0.50 1 d PD A 1 
O6B O 0.108(3) 0.569(2) 0.555(2) 0.245(11) Uiso 0.50 1 d PD A 2 
N1 N 0.7463(4) 0.6783(3) 0.5643(3) 0.0214(10) Uani 1 1 d . . . 
N2 N 0.6094(4) 0.5842(3) 0.2580(3) 0.0173(9) Uani 1 1 d . . . 
N3 N -0.1551(4) 0.7497(3) 0.0681(3) 0.0297(11) Uani 1 1 d . . . 
N4 N 0.1989(4) 0.8978(3) 0.0348(3) 0.0219(10) Uani 1 1 d . . . 
C1 C 0.6786(5) 0.5777(4) 0.5003(4) 0.0217(12) Uani 1 1 d . . . 
H1 H 0.6620 0.5295 0.5256 0.026 Uiso 1 1 calc R . . 
C2 C 0.6328(5) 0.5431(4) 0.3990(4) 0.0201(11) Uani 1 1 d . . . 
H2 H 0.5866 0.4733 0.3562 0.024 Uiso 1 1 calc R . . 
C3 C 0.6587(5) 0.6164(4) 0.3643(3) 0.0174(11) Uani 1 1 d . . . 
C4 C 0.7289(5) 0.7197(4) 0.4277(3) 0.0178(11) Uani 1 1 d . . . 
H4 H 0.7475 0.7689 0.4039 0.021 Uiso 1 1 calc R . . 
C5 C 0.7703(5) 0.7472(4) 0.5277(3) 0.0205(11) Uani 1 1 d . . . 
H5 H 0.8170 0.8167 0.5716 0.025 Uiso 1 1 calc R . . 
C6 C 0.4886(5) 0.5107(4) 0.2030(3) 0.0177(11) Uani 1 1 d . . . 
H6 H 0.4347 0.4838 0.2338 0.021 Uiso 1 1 calc R . . 
C7 C 0.4447(5) 0.4756(4) 0.1017(3) 0.0183(11) Uani 1 1 d . . . 
H7 H 0.3632 0.4229 0.0644 0.022 Uiso 1 1 calc R . . 
C8 C 0.5214(5) 0.5181(4) 0.0543(3) 0.0168(10) Uani 1 1 d . . . 
C9 C 0.6441(5) 0.5967(4) 0.1149(3) 0.0194(11) Uani 1 1 d . . . 
H9 H 0.6975 0.6277 0.0862 0.023 Uiso 1 1 calc R . . 
C10 C 0.6864(5) 0.6285(4) 0.2148(3) 0.0193(11) Uani 1 1 d . . . 
H10 H 0.7680 0.6805 0.2535 0.023 Uiso 1 1 calc R . . 
C11 C -0.0377(5) 0.7454(4) 0.1107(4) 0.0286(13) Uani 1 1 d . . . 
H11 H -0.0373 0.7080 0.1477 0.034 Uiso 1 1 calc R . . 
C12 C 0.0814(5) 0.7931(4) 0.1028(4) 0.0254(12) Uani 1 1 d . . . 
H12 H 0.1608 0.7883 0.1328 0.031 Uiso 1 1 calc R . . 
C13 C 0.0769(5) 0.8486(4) 0.0477(3) 0.0198(11) Uani 1 1 d . . . 
C14 C -0.0402(5) 0.8561(4) 0.0050(4) 0.0264(12) Uani 1 1 d . . . 
H14 H -0.0431 0.8941 -0.0313 0.032 Uiso 1 1 calc R . . 
C15 C -0.1537(5) 0.8052(4) 0.0177(4) 0.0275(13) Uani 1 1 d . . . 
H15 H -0.2337 0.8102 -0.0106 0.033 Uiso 1 1 calc R . . 
C16 C 0.3061(5) 0.9640(4) 0.1140(4) 0.0321(14) Uani 1 1 d . . . 
H16 H 0.2998 0.9816 0.1776 0.039 Uiso 1 1 calc R . . 
C17 C 0.4244(5) 1.0057(4) 0.1019(4) 0.0319(14) Uani 1 1 d . . . 
H17 H 0.4978 1.0510 0.1571 0.038 Uiso 1 1 calc R . . 
C18 C 0.4347(5) 0.9802(4) 0.0071(4) 0.0231(12) Uani 1 1 d . . . 
C19 C 0.3221(5) 0.9151(5) -0.0724(4) 0.0351(15) Uani 1 1 d . . . 
H19 H 0.3251 0.8988 -0.1367 0.042 Uiso 1 1 calc R . . 
C20 C 0.2066(5) 0.8745(5) -0.0576(4) 0.0357(15) Uani 1 1 d . . . 
H20 H 0.1319 0.8299 -0.1120 0.043 Uiso 1 1 calc R . . 
C21 C 0.3919(5) 0.7270(4) 0.1729(4) 0.0211(11) Uani 1 1 d . . . 
C22 C 0.3005(5) 0.6683(4) 0.1981(4) 0.0235(12) Uani 1 1 d . . . 
H22 H 0.3111 0.6837 0.2644 0.028 Uiso 1 1 calc R . . 
C23 C 0.1907(5) 0.5846(4) 0.1230(4) 0.0235(12) Uani 1 1 d . . . 
H23 H 0.1298 0.5442 0.1401 0.028 Uiso 1 1 calc R . . 
C24 C 0.1726(5) 0.5621(4) 0.0251(4) 0.0232(12) Uani 1 1 d . . . 
H24 H 0.0993 0.5068 -0.0237 0.028 Uiso 1 1 calc R . . 
C25 C 0.2643(5) 0.6220(4) -0.0021(3) 0.0178(11) Uani 1 1 d . . . 
C26 C 0.3783(5) 0.7043(4) 0.0717(3) 0.0180(11) Uani 1 1 d . . . 
C27 C 0.4735(5) 0.7618(4) 0.0434(4) 0.0216(11) Uani 1 1 d . . . 
H27 H 0.5497 0.8145 0.0914 0.026 Uiso 1 1 calc R . . 
C28 C 0.4531(5) 0.7396(4) -0.0541(4) 0.0254(12) Uani 1 1 d . . . 
H28 H 0.5173 0.7765 -0.0718 0.031 Uiso 1 1 calc R . . 
C29 C 0.3375(5) 0.6623(4) -0.1290(4) 0.0248(12) Uani 1 1 d . . . 
H29 H 0.3235 0.6508 -0.1947 0.030 Uiso 1 1 calc R . . 
C30 C 0.2453(5) 0.6039(4) -0.1032(4) 0.0218(11) Uani 1 1 d . . . 
C31 C 0.0980(5) 0.5089(4) -0.2700(4) 0.0291(13) Uani 1 1 d . . . 
H31A H 0.1706 0.4975 -0.2959 0.035 Uiso 1 1 calc R . . 
H31B H 0.0832 0.5695 -0.2741 0.035 Uiso 1 1 calc R . . 
C32 C -0.0245(5) 0.4163(4) -0.3288(4) 0.0300(13) Uani 1 1 d . . . 
H32A H -0.0971 0.4280 -0.3031 0.036 Uiso 1 1 calc R . . 
H32B H -0.0494 0.4041 -0.3976 0.036 Uiso 1 1 calc R . . 
C33 C 1.0916(5) 0.7670(4) 0.4021(4) 0.0296(13) Uani 1 1 d . . . 
H33A H 1.1810 0.7639 0.4121 0.036 Uiso 1 1 calc R . . 
H33B H 1.0696 0.7780 0.4629 0.036 Uiso 1 1 calc R . . 
C34 C 1.0852(5) 0.8535(4) 0.3776(4) 0.0332(14) Uani 1 1 d . . . 
H34A H 1.1419 0.9191 0.4335 0.040 Uiso 1 1 calc R . . 
H34B H 1.1168 0.8465 0.3211 0.040 Uiso 1 1 calc R . . 
C35 C 0.9433(5) 0.9456(4) 0.3496(4) 0.0294(13) Uani 1 1 d . . . 
H35A H 0.9833 0.9553 0.3009 0.035 Uiso 1 1 calc R . . 
H35B H 0.9913 1.0051 0.4135 0.035 Uiso 1 1 calc R . . 
C36 C 0.8013(5) 0.9376(4) 0.3208(4) 0.0295(13) Uani 1 1 d . . . 
H36A H 0.7936 0.9979 0.3120 0.035 Uiso 1 1 calc R . . 
H36B H 0.7512 0.8758 0.2590 0.035 Uiso 1 1 calc R . . 
C37 C 0.6278(5) 0.9502(4) 0.3960(4) 0.0260(12) Uani 1 1 d . . . 
H37A H 0.6202 0.9942 0.3632 0.031 Uiso 1 1 calc R . . 
H37B H 0.6269 0.9870 0.4634 0.031 Uiso 1 1 calc R . . 
C38 C 0.5101(5) 0.8516(4) 0.3426(3) 0.0250(12) Uani 1 1 d . . . 
H38A H 0.5216 0.8026 0.3685 0.030 Uiso 1 1 calc R . . 
H38B H 0.4296 0.8660 0.3512 0.030 Uiso 1 1 calc R . . 
C39 C -0.014(2) 0.5988(17) 0.5691(16) 0.277(11) Uiso 1 1 d D . . 
 
loop_ 
 _atom_site_aniso_label 
 _atom_site_aniso_U_11 
 _atom_site_aniso_U_22 
 _atom_site_aniso_U_33 
 _atom_site_aniso_U_23 
 _atom_site_aniso_U_13 
 _atom_site_aniso_U_12 
Hg1 0.03833(14) 0.02525(12) 0.01858(11) 0.01086(9) 0.00378(9) 0.00098(10) 
Hg2 0.04478(15) 0.02829(13) 0.02330(12) 0.00981(10) 0.00874(11) 0.01108(11) 
Cl1 0.0414(9) 0.0247(7) 0.0257(7) 0.0133(6) -0.0003(6) -0.0031(6) 
Cl2 0.0492(9) 0.0304(8) 0.0387(8) 0.0199(7) 0.0198(7) 0.0222(7) 
Cl3 0.0299(7) 0.0265(7) 0.0219(6) 0.0133(6) 0.0084(5) 0.0084(6) 
Cl4 0.0355(8) 0.0298(7) 0.0277(7) 0.0141(6) 0.0107(6) 0.0113(6) 
Cl5 0.0260(7) 0.0264(7) 0.0217(6) 0.0099(5) 0.0049(5) 0.0081(6) 
Cl6 0.0512(11) 0.0837(14) 0.0316(8) 0.0173(9) 0.0154(8) 0.0400(10) 
O1 0.024(2) 0.026(2) 0.0152(17) 0.0052(15) 0.0039(15) 0.0005(16) 
O2 0.022(2) 0.031(2) 0.0208(19) 0.0131(16) 0.0055(16) 0.0058(17) 
O3 0.0138(18) 0.027(2) 0.030(2) 0.0128(17) 0.0019(15) 0.0029(16) 
O4 0.026(2) 0.029(2) 0.023(2) -0.0045(17) -0.0080(16) 0.0090(18) 
O5 0.021(2) 0.029(2) 0.0200(19) 0.0037(16) 0.0031(16) 0.0010(17) 
N1 0.026(2) 0.018(2) 0.019(2) 0.0058(18) 0.0115(19) 0.0042(19) 
N2 0.017(2) 0.018(2) 0.014(2) 0.0059(17) 0.0045(17) 0.0019(18) 
N3 0.022(2) 0.032(3) 0.029(3) 0.013(2) 0.007(2) -0.002(2) 
N4 0.019(2) 0.024(2) 0.023(2) 0.0096(19) 0.0099(18) 0.0046(19) 
C1 0.030(3) 0.021(3) 0.026(3) 0.017(2) 0.015(2) 0.012(2) 
C2 0.020(3) 0.016(3) 0.023(3) 0.009(2) 0.006(2) 0.004(2) 
C3 0.013(2) 0.023(3) 0.014(2) 0.008(2) 0.0041(19) 0.004(2) 
C4 0.016(2) 0.018(3) 0.017(2) 0.008(2) 0.005(2) 0.003(2) 
C5 0.027(3) 0.015(3) 0.017(2) 0.004(2) 0.009(2) 0.006(2) 
C6 0.015(2) 0.020(3) 0.018(2) 0.008(2) 0.005(2) 0.004(2) 
C7 0.012(2) 0.021(3) 0.018(2) 0.010(2) 0.0008(19) 0.002(2) 
C8 0.016(2) 0.020(3) 0.018(2) 0.011(2) 0.005(2) 0.009(2) 
C9 0.014(2) 0.024(3) 0.020(2) 0.011(2) 0.005(2) 0.002(2) 
C10 0.015(2) 0.022(3) 0.018(2) 0.009(2) 0.005(2) 0.002(2) 
C11 0.033(3) 0.027(3) 0.024(3) 0.014(2) 0.005(2) 0.003(3) 
C12 0.023(3) 0.031(3) 0.025(3) 0.016(2) 0.008(2) 0.008(2) 
C13 0.018(3) 0.017(3) 0.018(2) 0.006(2) 0.005(2) 0.001(2) 
C14 0.030(3) 0.029(3) 0.020(3) 0.012(2) 0.007(2) 0.008(3) 
C15 0.014(3) 0.035(3) 0.029(3) 0.013(3) 0.004(2) 0.003(2) 
C16 0.031(3) 0.028(3) 0.020(3) 0.002(2) 0.010(2) -0.006(3) 
C17 0.026(3) 0.024(3) 0.028(3) 0.001(2) 0.010(2) -0.006(2) 
C18 0.028(3) 0.021(3) 0.025(3) 0.014(2) 0.012(2) 0.008(2) 
C19 0.018(3) 0.067(4) 0.022(3) 0.024(3) 0.009(2) 0.009(3) 
C20 0.024(3) 0.060(4) 0.017(3) 0.016(3) 0.003(2) 0.009(3) 
C21 0.019(3) 0.023(3) 0.019(3) 0.009(2) 0.005(2) 0.006(2) 
C22 0.024(3) 0.026(3) 0.016(3) 0.008(2) 0.003(2) 0.006(2) 
C23 0.021(3) 0.021(3) 0.030(3) 0.012(2) 0.012(2) 0.006(2) 
C24 0.017(3) 0.021(3) 0.025(3) 0.006(2) 0.006(2) 0.004(2) 
C25 0.012(2) 0.014(2) 0.021(3) 0.001(2) 0.004(2) 0.005(2) 
C26 0.011(2) 0.020(3) 0.022(3) 0.008(2) 0.005(2) 0.006(2) 
C27 0.015(3) 0.021(3) 0.019(3) 0.005(2) -0.002(2) 0.003(2) 
C28 0.024(3) 0.028(3) 0.024(3) 0.012(2) 0.010(2) 0.005(2) 
C29 0.026(3) 0.024(3) 0.018(3) 0.005(2) 0.006(2) 0.007(2) 
C30 0.012(2) 0.022(3) 0.022(3) 0.002(2) 0.003(2) 0.004(2) 
C31 0.025(3) 0.033(3) 0.020(3) 0.004(2) 0.005(2) 0.010(3) 
C32 0.026(3) 0.030(3) 0.024(3) 0.003(2) 0.001(2) 0.012(3) 
C33 0.020(3) 0.032(3) 0.018(3) -0.006(2) 0.000(2) 0.010(2) 
C34 0.015(3) 0.038(4) 0.028(3) 0.003(3) -0.001(2) 0.003(3) 
C35 0.031(3) 0.027(3) 0.031(3) 0.016(3) 0.011(3) 0.003(3) 
C36 0.031(3) 0.035(3) 0.025(3) 0.018(3) 0.007(2) 0.009(3) 
C37 0.027(3) 0.027(3) 0.022(3) 0.008(2) 0.006(2) 0.011(2) 
C38 0.030(3) 0.028(3) 0.018(3) 0.010(2) 0.009(2) 0.010(2) 
 
_geom_special_details 
; 
 All esds (except the esd in the dihedral angle between two l.s. planes) 
 are estimated using the full covariance matrix.  The cell esds are taken 
 into account individually in the estimation of esds in distances, angles 
 and torsion angles; correlations between esds in cell parameters are only 
 used when they are defined by crystal symmetry.  An approximate (isotropic) 
 treatment of cell esds is used for estimating esds involving l.s. planes. 
; 
 
loop_ 
 _geom_bond_atom_site_label_1 
 _geom_bond_atom_site_label_2 
 _geom_bond_distance 
 _geom_bond_site_symmetry_2 
 _geom_bond_publ_flag 
Hg1 N1 2.317(4) . ? 
Hg1 Cl2 2.3745(14) . ? 
Hg1 Cl1 2.4037(13) . ? 
Hg1 Cl3 2.6350(14) . ? 
Hg2 Cl5 2.4105(13) . ? 
Hg2 Cl4 2.4333(14) . ? 
Hg2 Cl6 2.4726(17) . ? 
Hg2 Cl3 2.6865(13) . ? 
O1 C21 1.363(6) . ? 
O1 C38 1.441(5) . ? 
O2 C36 1.425(6) . ? 
O2 C37 1.434(6) . ? 
O3 C34 1.422(6) . ? 
O3 C35 1.433(6) . ? 
O4 C32 1.426(6) . ? 
O4 C33 1.429(6) 2_665 ? 
O5 C30 1.366(5) . ? 
O5 C31 1.442(6) . ? 
O6A C39 1.514(16) . ? 
O6B C39 1.517(17) . ? 
N1 C5 1.337(6) . ? 
N1 C1 1.349(6) . ? 
N2 C6 1.354(6) . ? 
N2 C10 1.361(6) . ? 
N2 C3 1.458(6) . ? 
N3 C15 1.324(6) . ? 
N3 C11 1.348(7) . ? 
N4 C16 1.347(6) . ? 
N4 C20 1.349(6) . ? 
N4 C13 1.445(6) . ? 
C1 C2 1.379(7) . ? 
C2 C3 1.375(6) . ? 
C3 C4 1.379(6) . ? 
C4 C5 1.376(6) . ? 
C6 C7 1.377(6) . ? 
C7 C8 1.396(6) . ? 
C8 C9 1.406(6) . ? 
C8 C8 1.478(9) 2_665 ? 
C9 C10 1.365(6) . ? 
C11 C12 1.375(7) . ? 
C12 C13 1.386(7) . ? 
C13 C14 1.368(7) . ? 
C14 C15 1.377(7) . ? 
C16 C17 1.370(7) . ? 
C17 C18 1.389(7) . ? 
C18 C19 1.379(7) . ? 
C18 C18 1.495(10) 2_675 ? 
C19 C20 1.360(7) . ? 
C21 C22 1.373(7) . ? 
C21 C26 1.426(6) . ? 
C22 C23 1.409(7) . ? 
C23 C24 1.370(7) . ? 
C24 C25 1.406(6) . ? 
C25 C26 1.419(6) . ? 
C25 C30 1.432(7) . ? 
C26 C27 1.423(6) . ? 
C27 C28 1.362(6) . ? 
C28 C29 1.409(7) . ? 
C29 C30 1.383(7) . ? 
C31 C32 1.488(7) . ? 
C33 O4 1.429(6) 2_665 ? 
C33 C34 1.475(8) . ? 
C35 C36 1.488(7) . ? 
C37 C38 1.501(7) . ? 
 
loop_ 
 _geom_angle_atom_site_label_1 
 _geom_angle_atom_site_label_2 
 _geom_angle_atom_site_label_3 
 _geom_angle 
 _geom_angle_site_symmetry_1 
 _geom_angle_site_symmetry_3 
 _geom_angle_publ_flag 
N1 Hg1 Cl2 116.69(11) . . ? 
N1 Hg1 Cl1 102.37(10) . . ? 
Cl2 Hg1 Cl1 129.01(5) . . ? 
N1 Hg1 Cl3 92.58(11) . . ? 
Cl2 Hg1 Cl3 101.74(5) . . ? 
Cl1 Hg1 Cl3 108.15(5) . . ? 
Cl5 Hg2 Cl4 117.59(4) . . ? 
Cl5 Hg2 Cl6 112.95(5) . . ? 
Cl4 Hg2 Cl6 116.45(6) . . ? 
Cl5 Hg2 Cl3 110.75(4) . . ? 
Cl4 Hg2 Cl3 101.75(4) . . ? 
Cl6 Hg2 Cl3 93.67(5) . . ? 
Hg1 Cl3 Hg2 109.08(4) . . ? 
C21 O1 C38 118.1(4) . . ? 
C36 O2 C37 114.1(4) . . ? 
C34 O3 C35 112.1(4) . . ? 
C32 O4 C33 111.6(4) . 2_665 ? 
C30 O5 C31 117.0(4) . . ? 
C5 N1 C1 118.4(4) . . ? 
C5 N1 Hg1 119.4(3) . . ? 
C1 N1 Hg1 122.0(3) . . ? 
C6 N2 C10 120.4(4) . . ? 
C6 N2 C3 120.3(4) . . ? 
C10 N2 C3 119.3(4) . . ? 
C15 N3 C11 117.3(4) . . ? 
C16 N4 C20 119.8(4) . . ? 
C16 N4 C13 120.8(4) . . ? 
C20 N4 C13 119.4(4) . . ? 
N1 C1 C2 122.8(4) . . ? 
C3 C2 C1 117.0(4) . . ? 
C2 C3 C4 121.5(4) . . ? 
C2 C3 N2 119.1(4) . . ? 
C4 C3 N2 119.4(4) . . ? 
C5 C4 C3 117.5(4) . . ? 
N1 C5 C4 122.7(5) . . ? 
N2 C6 C7 120.6(4) . . ? 
C6 C7 C8 120.7(4) . . ? 
C7 C8 C9 116.8(4) . . ? 
C7 C8 C8 122.4(5) . 2_665 ? 
C9 C8 C8 120.9(5) . 2_665 ? 
C10 C9 C8 121.3(4) . . ? 
N2 C10 C9 120.2(4) . . ? 
N3 C11 C12 123.9(5) . . ? 
C11 C12 C13 116.4(5) . . ? 
C14 C13 C12 121.2(5) . . ? 
C14 C13 N4 120.2(4) . . ? 
C12 C13 N4 118.5(5) . . ? 
C13 C14 C15 117.5(5) . . ? 
N3 C15 C14 123.6(5) . . ? 
N4 C16 C17 120.8(5) . . ? 
C16 C17 C18 120.0(5) . . ? 
C19 C18 C17 117.8(5) . . ? 
C19 C18 C18 121.7(6) . 2_675 ? 
C17 C18 C18 120.5(6) . 2_675 ? 
C20 C19 C18 120.5(5) . . ? 
N4 C20 C19 121.0(5) . . ? 
O1 C21 C22 124.7(4) . . ? 
O1 C21 C26 114.1(4) . . ? 
C22 C21 C26 121.1(4) . . ? 
C21 C22 C23 119.7(5) . . ? 
C24 C23 C22 120.8(5) . . ? 
C23 C24 C25 120.3(5) . . ? 
C24 C25 C26 120.0(4) . . ? 
C24 C25 C30 121.9(4) . . ? 
C26 C25 C30 118.1(4) . . ? 
C25 C26 C27 119.7(4) . . ? 
C25 C26 C21 117.9(4) . . ? 
C27 C26 C21 122.3(4) . . ? 
C28 C27 C26 119.9(4) . . ? 
C27 C28 C29 121.9(5) . . ? 
C30 C29 C28 118.9(5) . . ? 
O5 C30 C29 125.1(5) . . ? 
O5 C30 C25 113.6(4) . . ? 
C29 C30 C25 121.2(4) . . ? 
O5 C31 C32 108.3(4) . . ? 
O4 C32 C31 108.9(4) . . ? 
O4 C33 C34 109.0(4) 2_665 . ? 
O3 C34 C33 109.7(4) . . ? 
O3 C35 C36 109.5(4) . . ? 
O2 C36 C35 106.7(4) . . ? 
O2 C37 C38 113.0(4) . . ? 
O1 C38 C37 107.0(4) . . ? 
O6B C39 O6A 106(2) . . ? 
 
_diffrn_measured_fraction_theta_max    0.994 
_diffrn_reflns_theta_full              30.03 
_diffrn_measured_fraction_theta_full   0.994 
_refine_diff_density_max    1.915 
_refine_diff_density_min   -1.654 
_refine_diff_density_rms    0.193 
